# Supplementary material
Source: MDPI journal article supplement (https://www.mdpi.com/2075-163X/13/9/1145)
Supplement: s1 [file s1]

Archive with 4 entries (4 files):
- Table S1_Analytical Methods.pdf
- TableS2_data.pdf
- TableS3_SI.pdf
- TableS4_Seasonality.pdf
