# Supplementary material
Source: MDPI journal article supplement (https://www.mdpi.com/2075-163X/13/9/1145)
Supplement: s1 [file s1 › Table S1_Analytical Methods.pdf]

**Table S1.** Laboratory analytical procedures and Mexican technical standards, describing analytical methodologies and quality controls for the analytical determination of arsenic, fluoride, nitrate, pH and temperature.

| Parameter                        | Analytical procedure, Mexican Standard<br>Reference Method                                                                                                                                                                        | Method                                                                                                                                                                                                                                         |
|----------------------------------|-----------------------------------------------------------------------------------------------------------------------------------------------------------------------------------------------------------------------------------|------------------------------------------------------------------------------------------------------------------------------------------------------------------------------------------------------------------------------------------------|
| Sampling                         | Water Sampling<br>NOM-014-SSA1-1993                                                                                                                                                                                               | Take sample in a clean 2 L glass (or plastic) container. Keep sample refrigerated in a dark place (4° – 10 °C). Analyze within 48 hours. Acidified samples can keep refrigerated up to 14 days.                                                |
| Arsenic                          | Water analysis – measurement of metals in natural waters, drinking, and wastewaters.<br>NMX-AA-051-SCFI-2016                                                                                                                      | Atomic Absorption (AA) with graphite furnace. Calibrate with standard solutions. Determine at least three readings of blank, a standard solution or a sample of known concentration. Keep control records. Use quality grade chemical reagents |
| Fluoride                         | Waters analysis - determination of fluoride in natural, wastewaters and wastewaters treated<br>NMX-AA-077-SCFI-2001                                                                                                               | Spectrophotometric or selective F Ion. Daily calibration with reference standards. Take reading after meter/electrode stabilizes (3 min). Use quality grade chemical reagents.                                                                 |
| Nitrate- N<br>NO <sub>3</sub> -N | Water Analysis – Determination of nitrate in natural waters<br>NMX-AA-079-SCFI-2001<br>Filtered samples need to be analyzed right away. Otherwise, preserve with sulfuric acid and maintain cool at 4°C for a maximum of 14 days. | Colorimetric method of cadmium – reduction (nitrate to nitrite) using colorimeter or spectrophotometer. Calibrate with standards, blanks, and solutions of known concentrations. Keep control records. Use quality grade chemical reagents     |
| pH                               | Water analysis -measurement of pH in natural waters, and wastewaters.<br>NMX-AA-008-SCFI-2016                                                                                                                                     | pH meter and buffer solutions for its calibration. Take reading preferably on site, or as soon as possible as pH value changes with time. Calibrate daily with buffer solutions (pH 4, pH 7 and pH 10)                                         |
| Temperature (°C)                 | Water analysis - determination of temperature in natural waters and wastewaters.<br>NMX-AA-007-SCFI-2013                                                                                                                          | Thermometer (glass or a sensor) with a minimum of 0.5 °C resolution. Immerse the sensor in water, mix gently and take the reading once value stabilizes. Measure <i>in situ</i> .                                                              |
