# Supplementary material
Source: MDPI journal article supplement (https://www.mdpi.com/2075-163X/13/9/1145)
Supplement: s1 [file s1 › TableS2_data.pdf]

**Table S2.** Well water data for Zacatecas. Concentrations in mg L<sup>-1</sup> except for Alkalinity (Alk), in mg CaCO<sub>3</sub> L<sup>-1</sup>. The Section number (in Roman numeral) is listed below the well number (N). Source: RENAMECA web site [22].

| No. | Well        | Year | Alk   | NO3-N | pH   | Cl    | F    | Na    | SO4   | As       | Ca    | Mg   | T °C |
|-----|-------------|------|-------|-------|------|-------|------|-------|-------|----------|-------|------|------|
| 1   | DLZAC2586   | 2012 | 166.4 | 3.37  | 7.89 | 15.4  | 1.08 | 64.2  | 47.7  | <0.01    | 41.2  | 4.0  | 25.8 |
| I   | DLZAC2586   | 2013 | 164.2 | 3.58  | 7.30 | 17.7  | 1.16 | 60.3  | 49.7  | <0.01    | 36.3  | <1   | 27.0 |
|     | DLZAC2586   | 2014 | 164.3 | 3.34  | 7.20 | 14.9  | 1.17 | 48.3  | 40.3  | <0.01    | 30.6  | 2.5  | 27.4 |
|     | DLZAC2586   | 2015 | 172.8 | 3.28  | 7.90 | 14.6  | 1.10 | 59.0  | 40.0  | <0.01    | 37.8  | 3.9  | 25.1 |
|     | DLZAC2586   | 2016 | 167.9 | 3.86  | 7.60 | 14.5  | 1.12 | 56.7  | 41.6  | <0.01    | 37.3  | 3.3  | 24.6 |
|     | DLZAC2586   | 2017 | 175.8 | 3.79  | 7.90 | 17.3  | 1.07 | 56.3  | 43.4  | 0.0097   | 37.8  | 3.7  | 24.6 |
|     | DLZAC2586   | 2018 | 167.1 | 3.89  | 7.60 | 26.0  | 1.22 | 54.2  | 43.1  | <0.00139 | 36.0  | 3.4  | 28.5 |
|     | DLZAC2586   | 2018 | 169.7 | 4.06  | 7.50 | 20.9  | 1.09 | 72.9  | 34.0  | 0.0133   | 47.3  | 4.4  | 25.2 |
|     | DLZAC2586   | 2019 | 170.6 | 3.69  | 7.70 | 16.4  | 1.10 | 61.7  | 38.9  | <0.00139 | 40.8  | 4.3  | 24.5 |
|     | DLZAC2586   | 2020 | 167.6 | 3.87  | 7.80 | 17.7  | 1.18 | 56.2  | 45.7  | 0.005    |       |      |      |
|     | DLZAC2586   | 2021 | 113.1 | 0.38  | 7.90 |       | 1.98 |       |       | na       |       |      |      |
| 2   | DLZAC2588   | 2012 | 211.6 | 4.22  | 8.08 | 24.0  | 2.10 | 72.3  | 53.0  | <0.01    | 41.5  | 11.2 | 24.2 |
| I   | DLZAC2588   | 2013 | 251.7 | 14.91 | 7.51 | 67.5  | 1.76 | n/a   | 155.7 | <0.01    |       | 6.8  | 24.8 |
|     | DLZAC2588   | 2014 | 207.1 | 8.07  | 7.69 | 46.4  | 2.23 | 126.6 | 162.5 | 0.0135   | 50.4  | 13.9 | 25.3 |
|     | DLZAC2588   | 2015 | 190.0 | 7.38  | 8.00 | 55.5  | 2.31 | 176.7 | 259.6 | <0.01    | 66.0  | 15.3 | 23.1 |
|     | DLZAC2588   | 2016 | 192.0 | 1.28  | 7.90 | 51.9  | 2.62 | 169.0 | 306.7 | 0.0146   | 49.0  | 12.5 | 24.6 |
|     | DLZAC2588   | 2017 | 211.1 | 5.93  | 8.30 | 41.6  | 1.93 | 85.2  | 159.5 | 0.0329   | 51.0  | 10.3 | 25.0 |
|     | DLZAC2588   | 2018 | 181.4 | 6.68  | 7.90 | 53.1  | 2.73 | 198.7 | 240.9 | 0.0125   | 55.4  | 11.1 | 28.1 |
|     | DLZAC2588   | 2018 | 193.9 | 8.86  | 7.50 | 59.3  | 2.42 | 209.8 | 240.3 | 0.0122   | 68.5  | 14.4 | 25.2 |
|     | DLZAC2588   | 2019 | 186.0 | 5.45  | 7.90 | 47.7  | 2.55 | 168.0 | 229.1 | <0.00139 | 55.5  | 11.2 | 24.2 |
|     | DLZAC2588   | 2020 | 190.9 | 6.91  | 8.20 | 44.3  | 2.45 | 150.7 | 228.6 | 0.005    |       |      |      |
| 3   | DLZAC2589M1 | 2012 | 234.4 | 7.84  | 7.57 | 434.3 | 1.47 | 261.5 | 410.0 | <0.01    | 161.9 | 84.7 | 20.8 |
| I   | DLZAC2589M1 | 2013 | 214.1 | 8.77  | 7.31 | 464.3 | 1.63 | 310.4 | 403.1 | <0.01    | 169.9 | 92.7 | 30.6 |
|     | DLZAC2589M1 | 2014 | 212.0 | 8.53  | 7.68 | 495.9 | 1.64 | 302.7 | 586.9 | 0.014    | 151.0 | 81.0 | 22.4 |
|     | DLZAC2589M1 | 2015 | 221.5 | 8.36  | 7.80 | 426.2 | 1.48 | 330.0 | 393.4 | 0.0109   | 156.9 | 83.9 | 21.2 |
|     | DLZAC2589M1 | 2016 | 217.0 | 7.58  | 7.60 | 570.5 | 1.49 | 318.4 | 599.1 | 0.0132   | 171.3 | 84.5 | 24.4 |
|     | DLZAC2589M1 | 2017 | 235.0 | 14.55 | 7.10 | 430.5 | 1.43 | 305.7 | 498.9 | 0.016    | 170.0 | 89.4 | 23.1 |
|     | DLZAC2589M1 | 2018 | 231.7 | 8.91  | 7.30 | 488.0 | 1.50 | 362.1 | 458.5 | 0.0237   | 171.0 | 84.1 | 25.0 |
|     | DLZAC2589M1 | 2018 | 246.3 | 5.63  | 7.90 | 586.4 | 1.44 | 412.8 | 573.5 | 0.0197   | 217.7 | 97.4 | 22.2 |
|     | DLZAC2589M1 | 2019 | 225.2 | 5.39  | 7.30 | 472.5 | 1.38 | 383.2 | 533.6 | 0.0211   | 130.7 | 92.6 | 24.9 |
|     | DLZAC2589M1 | 2020 | 212.4 | 12.59 | 7.30 | 606.6 | 1.38 | 411.3 | 594.9 | <0.01    |       |      |      |
|     | DLZAC2589M1 | 2021 | 210.7 | 12.82 | 7.00 | 606.1 | 1.56 | 398.1 | 807.6 | 0.0226   |       |      |      |
| 4   | DLZAC2593   | 2012 | 153.6 | 3.40  | 8.20 | 14.4  | 2.56 | 51.4  | 28.6  | 0.0433   | 26.9  | 9.7  | 26.9 |
| I   | DLZAC2593   | 2013 | 140.3 | 3.34  | 7.73 | 14.4  | 2.56 | 49.4  | 19.3  | <0.01    | 25.2  | 9.8  | 28.5 |
|     | DLZAC2593   | 2014 | 149.5 | 3.37  | 8.07 | 13.9  | 2.56 | 44.7  | 22.4  | 0.0309   | 23.9  | 8.9  | 27.0 |
|     | DLZAC2593   | 2015 | 153.8 | 3.04  | 8.10 | 16.3  | 2.35 | 57.4  | 20.6  | 0.0376   | 31.6  | 11.2 | 23.5 |
|     | DLZAC2593   | 2016 | 159.8 | 2.39  | 8.20 | 14.8  | 2.58 | 31.8  | 21.6  | <0.01    | 18.0  | 6.8  | 29.2 |
|     | DLZAC2593   | 2017 | 167.4 | 2.89  | 7.80 | 18.7  | 2.48 | 56.5  | 20.9  | 0.0382   | 28.7  | 10.9 | 30.4 |
|     | DLZAC2593   | 2018 | 172.7 | 3.29  | 8.10 | 37.2  | 2.55 | 58.6  | 21.2  | 0.0385   | 24.8  | 13.0 | 27.8 |
|     | DLZAC2593   | 2018 | 174.4 | 3.14  | 8.20 | 14.3  | 2.74 | 55.6  | 26.7  | 0.0343   | 29.3  | 10.5 | 24.8 |
|     | DLZAC2593   | 2019 | 152.9 | 3.54  | 8.20 | 15.4  | 2.57 | 55.2  | 22.1  | 0.031    | 19.9  | 10.0 | 28.6 |
|     | DLZAC2593   | 2020 | 157.6 | 4.07  | 8.20 | 20.2  | 2.53 | 50.0  | 22.3  | 0.0328   | 24.0  | 9.1  | 31.6 |
|     | DLZAC2593   | 2021 |       | 3.22  | 7.40 |       |      |       | 19.1  | 0.0361   |       |      | 25.0 |
| 5   | DLZAC2595M1 | 2013 | 100.0 | 2.83  | 7.59 | 11.4  | 0.88 | 50.0  | 32.5  | <0.01    | 34.0  | 16.7 | 17.6 |
| I   | DLZAC2595M1 | 2013 | 184.1 | 2.97  | 7.44 | <10   | 0.86 | 35.3  | 25.4  | <0.01    | 31.8  | 15.9 | 26.0 |
|     | DLZAC2595M1 | 2014 | 183.8 | 2.92  | 7.88 | <10   | 0.98 | 29.7  | 32.3  | 0.0147   | 28.6  | 13.7 | 22.1 |
|     | DLZAC2595M1 | 2015 | 185.3 | 2.76  | 7.80 | 11.5  | 0.86 | 40.1  | 27.6  | <0.01    | 40.0  | 18.4 | 20.2 |
|     | DLZAC2595M1 | 2016 | 183.6 | 2.02  | 8.00 | <10   | 0.88 | 22.2  | 25.8  | <0.01    | 22.8  | 11.2 | 23.8 |
|     | DLZAC2595M1 | 2017 | 182.0 | 2.88  | 8.10 | 20.1  | 0.87 | 41.3  | 30.1  | 0.0226   | 38.2  | 18.9 | 22.8 |

| N        | Well code   | Year | Alk   | NO3-N | pH   | Cl   | F    | Na    | SO4  | As       | Ca   | Mg   | T°C    |
|----------|-------------|------|-------|-------|------|------|------|-------|------|----------|------|------|--------|
| 6<br>IV  | DLZAC2595M1 | 2018 | 190.3 | 3.00  | 7.98 | 16.6 | 0.88 | 38.5  | 23.3 | 0.0183   | 36.0 | 18.3 | 23.8   |
|          | DLZAC2595M1 | 2018 | 204.9 | 2.88  | 8.30 | 10.3 | 0.91 | 39.2  | 31.8 | 0.0197   | 38.7 | 18.3 | 20.1   |
|          | DLZAC2595M1 | 2019 | 181.3 | 3.49  | 8.10 | 9.2  | 0.95 | 40.8  | 27.4 | <0.00139 | 24.6 | 16.7 | 21.1   |
|          | DLZAC2595M1 | 2020 | 186.5 | 3.56  | 7.90 | <10  | 0.90 | 31.1  | 27.5 | 0.0125   | 31.6 | 15.8 | 22.5   |
|          | DLZAC2596   | 2012 | 197.1 | 1.38  | 7.79 | 11.4 | 2.67 | 65.4  | 52.6 | 0.1277   | 44.9 | 6.0  | 25.4   |
|          | DLZAC2596   | 2013 | 221.9 | 1.96  | 7.58 | 12.4 | 2.80 | 73.7  | 46.7 | 0.1121   | 47.2 | 8.2  | 26.3   |
|          | DLZAC2596   | 2014 | 199.0 | 1.31  | 7.40 | 15.3 | 2.90 | 50.6  | 43.1 | 0.0881   | 34.1 | 4.2  | 27.5   |
|          | DLZAC2596   | 2015 | 205.6 | 1.31  | 7.60 | 11.4 | 2.70 | 61.7  | 38.0 | 0.0936   | 41.0 | 5.6  | 25.2   |
|          | DLZAC2596   | 2016 | 204.9 | 1.24  | 7.60 | 10.4 | 2.77 | 60.6  | 40.7 | 0.0882   | 42.8 | 5.1  | 26.8   |
|          | DLZAC2596   | 2017 | 204.9 | 1.03  | 7.50 | 18.7 | 2.65 | 58.2  | 39.6 | 0.0993   | 41.7 | 6.1  | 26.0   |
|          | DLZAC2596   | 2018 | 233.7 | 0.53  | 7.60 | 11.7 | 2.91 | 82.3  | 43.4 | 0.1241   | 57.4 | 7.0  | 27.1   |
|          | DLZAC2596   | 2018 | 212.6 | 1.37  | 7.30 | 14.8 | 3.02 | 51.8  | 41.9 | 0.0854   | 37.1 | 5.1  | 25.2   |
|          | DLZAC2596   | 2019 | 192.6 | 1.48  | 7.60 | 13.0 | 2.60 | 75.4  | 54.1 | 0.098    | 48.9 | 5.3  | 25.4   |
|          | DLZAC2596   | 2020 | 202.0 | 1.44  | 7.40 | 12.3 | 2.75 | 22.2  | 19.7 | 28.13    | 36.6 | 45.1 | <0.028 |
|          | DLZAC2596   | 2021 | 139.4 | 0.20  | 8.10 |      |      | 1.98  | 10.3 |          |      |      | 22.5   |
| 7        | DLZAC2597   | 2012 | 223.9 | 4.33  | 8.09 | 18.0 | 1.36 | 51.3  | 34.3 | <0.01    | 43.1 | 11.2 | 21.0   |
| I        | DLZAC2597   | 2013 | 208.0 | 3.29  | 7.44 | 12.9 | 1.11 | 49.5  | 31.6 | <0.01    | 40.1 | 10.8 | 22.5   |
|          | DLZAC2597   | 2014 | 207.1 | 4.65  | 7.72 | 13.0 | 1.24 | 44.0  | 34.1 | <0.01    | 40.0 | 10.6 | 21.0   |
|          | DLZAC2597   | 2015 | 201.5 | 3.48  | 7.70 | 13.9 | 1.18 | 53.6  | 34.4 | <0.01    | 46.9 | 12.6 | 19.9   |
|          | DLZAC2597   | 2016 | 240.9 | 2.33  | 7.70 | <10  | 1.28 | 48.0  | 26.8 | <0.01    | 46.7 | 11.4 | 20.6   |
|          | DLZAC2597   | 2018 | 217.3 | 4.95  | 7.70 | 15.3 | 1.29 | 56.4  | 32.6 | <0.00139 | 47.1 | 13.6 | 23.0   |
|          | DLZAC2597   | 2018 | 218.2 | 5.22  | 7.90 | 18.0 | 1.26 | 63.5  | 26.5 | <0.00139 | 58.8 | 15.1 | 22.4   |
|          | DLZAC2597   | 2019 | 218.0 | 4.11  | 7.60 | 14.0 | 1.14 | 53.6  | 27.0 | <0.00139 | 48.9 | 13.9 | 21.3   |
|          | DLZAC2597   | 2020 | 216.5 | 5.41  | 7.80 | 15.8 | 1.27 | 49.3  | 32.3 | <0.01    | 45.1 | 11.9 | 25.1   |
|          | DLZAC2597   | 2021 | 102.0 | 0.43  | 8.50 |      | 1.17 |       |      |          |      |      | 21.0   |
|          | DLZAC2598   | 2012 | 142.8 | 1.91  | 7.96 | <10  | 3.32 | 30.5  | <15  | <0.01    | 45.7 | 2.2  | 24.3   |
| IV       | DLZAC2598   | 2013 | 146.3 | 2.03  | 7.76 | <10  | 3.08 | 26.1  | <15  | <0.01    | 37.9 | 2.1  | 27.6   |
|          | DLZAC2598   | 2014 | 144.4 | 2.00  | 7.70 | <10  | 3.46 | 28.9  | <15  | <0.01    | 46.5 | 1.8  | 24.4   |
|          | DLZAC2598   | 2015 | 164.9 | 2.18  | 7.90 | <10  | 1.93 | 18.7  | <15  | <0.01    | 30.0 | 1.1  | 25.1   |
|          | DLZAC2598   | 2016 | 164.9 | 2.02  | 7.60 | <10  | 3.30 | 28.3  | <15  | <0.01    |      |      | 25.6   |
|          | DLZAC2598   | 2017 | 155.8 | 1.98  | 7.90 | 10.3 | 3.22 | 28.6  | 9.1  | <0.00139 | 45.2 | 2.0  | 23.7   |
|          | DLZAC2598   | 2018 | 150.7 | 2.15  | 7.80 | <10  | 3.42 | 31.9  | 12.8 | <0.00139 | 50.3 | 2.2  | 26.4   |
|          | DLZAC2598   | 2018 | 151.7 | 2.04  | 7.90 | <10  | 3.23 | 26.0  |      | 0.00983  | 41.3 | 1.8  | 23.4   |
|          | DLZAC2598   | 2019 | 160.5 | 2.36  | 7.90 | 10.7 | 3.05 | 31.2  | 9.2  | <0.00139 | 43.7 | 1.9  | 27.6   |
|          | DLZAC2598   | 2020 | 152.1 | 1.90  | 7.80 | <10  | 3.20 | 31.9  | 9.5  |          | 50.3 | 2.2  | 27.2   |
|          | DLZAC2598   | 2021 | 112.2 | 0.23  | 7.76 |      | 1.92 |       | 9.8  |          |      |      | 21.4   |
|          | DLZAC2599   | 2012 | 177.9 | 2.91  | 8.08 | 13.9 | 3.69 | 56.9  | 41.8 | 0.1381   | 47.5 | 6.7  | 25.5   |
|          | DLZAC2599   | 2013 | 174.1 | 2.76  | 7.26 | 12.4 | 3.66 | 54.7  | 37.9 | 0.0987   | 44.6 | 6.8  | 27.3   |
|          | DLZAC2599   | 2014 | 180.2 | 2.92  | 7.70 | 12.5 | 4.29 | 43.0  | 29.8 | 0.0914   | 34.7 | 4.8  | 28.1   |
| 9<br>IV  | DLZAC2599   | 2015 | 179.1 | 2.57  | 8.10 | 12.4 | 2.45 | 52.9  | 32.8 | 0.1066   | 43.1 | 6.3  | 26.9   |
|          | DLZAC2599   | 2016 | 180.9 | 2.81  | 7.80 | 12.7 | 3.84 | 50.8  | 33.6 | 0.0982   | 44.3 | 5.7  | 27.8   |
|          | DLZAC2599   | 2017 | 185.1 | 2.76  | 7.60 | 21.1 | 3.70 | 47.1  | 28.6 | 0.1059   | 42.3 | 6.6  | 28.9   |
|          | DLZAC2599   | 2018 | 189.5 | 2.98  | 7.80 | 16.4 | 3.09 | 61.9  | 34.8 | 0.1280   | 53.1 | 7.3  | 26.6   |
|          | DLZAC2599   | 2018 | 199.5 | 2.99  | 7.70 | 15.8 | 4.05 | 42.8  | 31.4 | 0.0883   | 38.4 | 5.8  | 25.6   |
|          | DLZAC2599   | 2019 | 186.2 | 3.22  | 7.70 | 15.8 | 3.86 | 67.7  | 33.8 | 0.1322   | 55.9 | 7.6  | 26.3   |
|          | DLZAC2599   | 2020 | 178.7 | 3.66  | 7.70 | 14.8 | 3.83 | 48.3  | 33.9 | 0.1051   | 42.5 | 6.2  | 28.6   |
|          | DLZAC2599   | 2021 | 178.5 | 3.35  | 7.70 | 17.1 | 3.82 | 51.8  | 28.6 | 0.1103   | 52.6 | 8.0  | 28.0   |
|          | DLZAC2600   | 2012 | 226.8 | 0.28  | 8.80 | <10  | <0.2 | 115.3 | 16.4 | 0.0564   | 17.4 | <1   | 28.8   |
|          | DLZAC2600   | 2013 | 215.9 | 0.28  | 7.98 | <10  | 8.66 | 77.8  | <15  | 0.0437   | 11.1 | <1   | 32.6   |
| 10<br>IV | DLZAC2600   | 2014 | 218.3 | 0.31  | 8.00 | <10  | 7.05 | 100.6 | 23.4 | 0.0579   | 18.0 | <1   | 33.6   |
|          | DLZAC2600   | 2015 | 227.0 | 0.26  | 8.20 | <10  | 3.20 | 69.4  | <15  | 0.0366   | 11.0 | <1   | 29.9   |
|          | DLZAC2600   | 2016 | 221.3 | 0.34  | 8.10 | <10  | 7.22 | 86.0  | 19.6 | 0.0534   | 18.4 | <1   | 30.1   |

| N  | Well code | Year | Alk   | NO3-N | pH   | Cl   | F    | Na    | SO4   | As       | Ca    | Mg   | T°C  |
|----|-----------|------|-------|-------|------|------|------|-------|-------|----------|-------|------|------|
|    | DLZAC2600 | 2017 | 216.3 | 0.26  | 7.70 | 13.6 | 7.89 | 92.9  | 11.1  | 0.051    | 15.2  | 0.1  | 32.8 |
|    | DLZAC2600 | 2018 | 232.7 | 0.28  | 8.10 | 13.8 | 7.77 | 101.0 | 21.7  | 0.0428   | 16.0  | 0.1  | 30.4 |
|    | DLZAC2600 | 2018 | 219.4 | 0.28  | 8.10 | 12.8 | 7.84 | 105.4 | 13.9  | 0.0545   | 15.1  | 0.1  | 29.9 |
|    | DLZAC2600 | 2019 | 224.7 | 0.27  | 8.00 | 12.1 | 5.61 | 98.4  | 12.6  | 0.1117   | 24.2  | 0.1  | 30.0 |
|    | DLZAC2600 | 2020 | 215.7 | 0.26  | 8.00 | <10  | 7.37 | 94.5  | <15   | 0.0519   | 15.4  | <1   | 28.2 |
|    | DLZAC2600 | 2021 | 153.9 | 0.07  | 8.10 |      | 2.30 |       |       |          |       |      | 32.0 |
| 11 | DLZAC2602 | 2013 | 227.5 | 1.28  | 8.14 | 16.0 | 2.14 | 80.8  | 79.1  | 0.0373   | 51.6  | <1   | 24.2 |
| IV | DLZAC2602 | 2014 | 234.3 | 1.79  | 7.40 | <10  | 1.84 | 79.4  | 91.1  | 0.0422   | 66.6  | 9.3  | 28.0 |
|    | DLZAC2602 | 2015 | 360.8 | 3.88  | 7.40 | 17.7 | 1.48 | 63.1  | 241.0 | 0.0362   | 110.6 | 12.2 | 23.7 |
|    | DLZAC2602 | 2016 | 220.2 | 0.85  | 8.40 | <10  | 1.95 | 75.3  | 58.9  | 0.0281   | 43.0  | 4.5  | 25.2 |
|    | DLZAC2602 | 2017 | 225.5 | 1.32  | 7.50 | 12.2 | 1.83 | 76.6  | 87.9  | 0.0368   | 48.3  | 5.9  | 24.8 |
|    | DLZAC2602 | 2018 | 209.1 | 0.62  | 7.70 | 14.3 | 0.23 | 82.9  | 23.4  | 0.0387   | 50.7  | 6.0  | 25.4 |
|    | DLZAC2602 | 2018 | 203.0 | 0.80  | 8.30 | 16.6 | 4.84 | 51.1  | 36.7  | 0.0518   | 29.2  | 5.2  | 23.4 |
|    | DLZAC2602 | 2019 | 349.9 | 1.64  | 7.80 | 19.0 | 3.85 | 112.5 | 98.1  | 0.0993   | 87.4  | 11.0 | 25.9 |
| 12 | DLZAC2603 | 2012 | 230.4 | 2.65  | 7.83 | 20.3 | 1.64 | 100.8 | 78.4  | 0.0795   | 50.3  | 7.5  | 28.5 |
| I  | DLZAC2603 | 2013 | 233.8 | 2.63  | 7.55 | 20.6 | 1.74 | 90.7  | 85.0  | 0.0928   | 40.9  | 5.0  | 30.9 |
|    | DLZAC2603 | 2014 | 226.2 | 2.59  | 7.62 | 19.0 | 1.87 | 79.7  | 76.0  | 0.0517   | 41.8  | 5.9  | 28.9 |
|    | DLZAC2603 | 2015 | 224.4 | 2.39  | 7.70 | 22.0 | 1.52 | 85.7  | 61.7  | 0.0627   | 47.6  | 6.8  | 22.5 |
|    | DLZAC2603 | 2016 | 231.1 | 2.87  | 7.70 | 17.2 | 1.65 | 79.2  | 66.0  | 0.0520   | 44.8  | 5.9  | 26.4 |
|    | DLZAC2603 | 2017 | 223.6 | 3.05  | 8.20 | 22.0 | 1.51 | 70.0  | 63.6  | 0.0550   | 46.6  | 7.0  | 26.4 |
|    | DLZAC2603 | 2018 | 232.7 | 2.71  | 7.60 | 24.0 | 1.75 | 96.9  | 62.0  | 0.0694   | 54.1  | 8.3  | 28.8 |
|    | DLZAC2603 | 2018 | 225.2 | 2.82  | 7.60 | 26.7 | 1.56 | 100.2 | 52.2  | 0.0743   | 58.0  | 8.4  | 26.1 |
|    | DLZAC2603 | 2020 | 227.6 | 2.93  | 7.70 | 20.7 | 1.62 | 75.0  | 64.0  | 0.0559   | 45.9  | 6.7  | 26.6 |
|    | DLZAC2603 | 2021 | 112.2 | 0.29  | 8.50 |      | 1.66 |       |       |          |       |      | 27.0 |
| 13 | DLZAC2605 | 2012 | 188.2 | 8.10  | 7.82 | 17.9 | 0.42 | 18.5  | 16.2  | <0.01    | 80.5  | 9.3  | 25.3 |
| IV | DLZAC2605 | 2013 | 169.6 | 8.92  | 7.56 | 18.7 | 0.43 | 19.4  | 19.1  | <0.01    | 77.3  | 8.2  | 25.5 |
|    | DLZAC2605 | 2014 | 187.3 | 9.61  | 7.60 | 18.7 | 0.49 | 18.7  |       | <0.01    | 87.2  | 11.1 | 27.1 |
|    | DLZAC2605 | 2015 | 197.9 | 7.62  | 7.80 | 18.1 | 0.47 | 11.5  | 17.8  | <0.01    | 50.0  | 5.9  | 24.6 |
|    | DLZAC2605 | 2016 | 190.8 | 7.03  | 7.20 | 20.0 | 0.46 | 17.7  | 20.9  | <0.01    | 78.4  | 8.1  | 25.6 |
|    | DLZAC2605 | 2017 | 192.7 | 9.28  | 8.10 | 23.4 | 0.42 | 18.7  | 16.3  | <0.00139 | 80.7  | 9.2  | 25.0 |
|    | DLZAC2605 | 2018 | 196.8 | 8.64  | 7.50 | 20.9 | 0.53 | 21.5  | 24.0  | <0.00139 | 89.6  | 9.7  | 24.8 |
|    | DLZAC2605 | 2018 | 192.9 | 12.61 | 7.40 | 22.8 | 0.47 | 23.7  | 13.9  | <0.00139 | 99.8  | 11.1 | 24.1 |
|    | DLZAC2605 | 2019 | 198.0 | 9.88  | 7.50 | 23.7 | 0.44 | 20.7  | 18.1  | <0.00139 | 84.6  | 9.3  | 23.3 |
|    | DLZAC2605 | 2020 | 197.6 | 9.42  | 7.50 | 20.0 | 0.45 | 17.5  | 15.7  | <0.01    | 80.6  | 9.1  | 26.2 |
|    | DLZAC2605 | 2021 | 148.8 | 1.35  | 8.48 |      | 0.32 |       |       |          |       |      | 27.0 |
| 14 | DLZAC2606 | 2012 | 162.6 | 1.58  | 8.19 | <10  | 2.35 | 52.5  | 23.6  | <0.01    | 37.2  | 3.3  | 23.4 |
| IV | DLZAC2606 | 2013 | 149.5 | 1.19  | 7.63 | <10  | 2.34 | 54.5  | 27.7  | <0.01    | 33.1  | 2.5  | 23.6 |
|    | DLZAC2606 | 2014 | 178.3 | 2.56  | 8.10 | 10.1 | 2.36 | 58.8  | 35.2  | <0.01    | 41.8  | 4.7  | 20.8 |
|    | DLZAC2606 | 2015 | 170.9 | 1.12  | 7.70 | 12.7 | 1.55 | 48.9  | 32.8  | <0.01    | 40.9  | 4.3  | 23.7 |
|    | DLZAC2606 | 2016 | 172.2 | 0.96  | 7.40 | <10  | 2.50 | 50.4  | 32.1  | <0.01    | 35.4  | 2.9  | 24.6 |
|    | DLZAC2606 | 2017 | 176.3 | 1.08  | 8.40 | 12.6 | 3.63 | 70.0  | 28.2  | 0.0232   | 27.8  | 1.8  | 24.6 |
|    | DLZAC2606 | 2018 | 180.4 | 1.19  | 7.80 | 9.2  | 2.75 | 50.1  | 30.6  | <0.00139 | 34.3  | 2.9  | 23.3 |
|    | DLZAC2606 | 2018 | 181.8 | 2.90  | 7.40 | 18.0 | 2.33 | 71.7  | 41.7  | 0.0165   | 50.8  | 5.7  | 22.7 |
|    | DLZAC2606 | 2019 | 169.1 | 1.27  | 7.60 | 9.8  | 2.34 | 55.6  | 25.2  | <0.00139 | 46.2  | 3.7  | 23.8 |
|    | DLZAC2606 | 2020 | 183.2 | 3.43  | 7.60 | 15.0 | 1.78 | 47.7  | 33.9  | <0.01    | 45.5  | 5.9  | 23.4 |
|    | DLZAC2606 | 2021 | n/a   | 9.48  | 7.30 |      |      | 87.2  |       | 0.0137   |       |      | 23.0 |
| 15 | DLZAC2608 | 2012 | 157.4 | 1.13  | 7.88 | <10  | 1.79 | 48.4  | 20.7  | <0.01    | 31.8  | 2.2  | 26.4 |
| IV | DLZAC2608 | 2013 | 143.1 | 1.22  | 7.67 | 20.6 | 1.85 | 62.4  | 27.8  | <0.01    | 33.8  | 2.3  | 27.2 |
|    | DLZAC2608 | 2014 | 161.9 | 1.20  | 8.00 | 14.6 | 1.84 | 46.1  | 25.3  | <0.01    | 29.0  | 1.8  | 27.6 |
|    | DLZAC2608 | 2015 | 156.3 | 1.19  | 7.60 | <10  | 1.81 | 46.9  | 25.4  | <0.01    | 29.9  | 2.1  | 26.7 |
|    | DLZAC2608 | 2016 | 161.3 | 0.89  | 7.70 | 58.5 | 2.16 | 47.9  | 23.6  | <0.01    | 31.0  | 1.9  | 23.0 |
|    | DLZAC2608 | 2017 | 168.1 | 0.86  | 8.20 | 10.8 | 1.95 | 49.6  | 17.8  | 0.00825  | 33.5  | 2.4  | 22.0 |

| N  | Well code   | Year | Alk   | NO3-N | pH   | Cl   | F    | Na   | SO4     | As       | Ca   | Mg   | T °C |
|----|-------------|------|-------|-------|------|------|------|------|---------|----------|------|------|------|
|    | DLZAC2608   | 2018 | 172.2 | 1.16  | 7.60 | <10  | 2.39 | 54.2 | 28.7    | <0.00139 | 35.2 | 2.5  | 27.0 |
|    | DLZAC2608   | 2018 | 161.6 | 1.70  | 7.70 | <10  | 1.91 | 60.7 | 21.6    | 0.0143   | 39.6 | 2.7  | 25.8 |
|    | DLZAC2608   | 2019 | 163.7 | 1.19  | 7.90 | <10  | 1.87 | 52.2 | 21.6    | <0.00139 | 40.3 | 2.7  | 27.3 |
|    | DLZAC2608   | 2020 | 163.2 | 1.35  | 7.70 | <10  | 1.91 | 75.6 | 26.6    | <0.01    | 33.1 | 2.4  | 26.6 |
|    | DLZAC2608   | 2021 | 157.0 | 1.24  | 7.40 | <10  | 2.11 |      | 26.0    | <0.01    | 35.4 | 3.0  | 27.0 |
| 16 | DLZAC2609M1 | 2013 | 100.0 | n/a   | 7.65 | 19.9 | <0.2 | 50.0 | 32.5    | <0.01    | 98.8 | 20.3 | 14.9 |
| IV | DLZAC2609M1 | 2013 | 147.3 | 3.42  | 8.06 | 12.4 | 1.65 | 37.2 | 15.2    | 0.0166   | 28.9 | 5.7  | 28.6 |
|    | DLZAC2609M1 | 2014 | 145.5 | 3.33  | 8.10 | <10  | 1.80 | 33.6 | <15     | <0.01    | 25.9 | 4.8  | 31.0 |
|    | DLZAC2609M1 | 2015 | 220.5 | 2.50  | 7.80 | 13.3 | 0.56 | 36.3 | 31.3    | <0.01    | 55.9 | 10.6 | 17.8 |
|    | DLZAC2609M1 | 2016 | 268.1 | 1.66  | 8.50 | <10  | 0.53 | 40.2 | 22.4    | <0.01    | 52.8 | 11.1 | 18.4 |
|    | DLZAC2609M1 | 2017 | 241.3 | 2.18  | 8.20 | 39.8 | 0.58 | 47.2 | 19.5    | 0.0121   | 71.3 | 14.2 | 18.6 |
|    | DLZAC2609M1 | 2018 | 131.8 | 3.22  | 8.00 | 15.4 | 1.58 | 46.6 | 31.5    | 0.0172   | 38.6 | 7.7  | 23.9 |
|    | DLZAC2609M1 | 2018 | 160.2 | 3.13  | 7.70 | 12.8 | 1.75 | 31.3 | 13.0    | <0.00139 | 27.4 | 6.0  | 29.5 |
|    | DLZAC2609M1 | 2019 | 151.9 | 3.81  | 8.30 | 13.0 | 1.74 | 56.3 | 12.4    | 0.0166   | 35.4 | 6.8  | 27.7 |
|    | DLZAC2609M1 | 2020 | 149.9 | 3.75  | 7.70 | 11.3 | 1.73 | 39.2 | <15     | 0.0112   | 29.5 | 6.5  | 24.9 |
|    | DLZAC2609M1 | 2021 | 106.3 | 0.42  | 8.40 |      | 1.68 |      |         |          |      |      | 19.0 |
| 17 | DLZAC2610   | 2012 | 196.0 | 2.40  | 8.04 | <10  | 0.69 | 29.2 | <15     | <0.01    | 58.0 | 10.8 | 22.9 |
| IV | DLZAC2610   | 2013 | 195.0 | 2.33  | 8.11 | <10  | 0.74 | 24.5 | <15     | <0.01    | 45.2 | 8.8  | 25.6 |
|    | DLZAC2610   | 2014 | 188.3 | 2.25  | 7.60 | <10  | 0.80 | 26.2 | <15     | <0.01    | 56.3 | 11.0 | 24.1 |
|    | DLZAC2610   | 2015 | 195.0 | 2.30  | 7.90 | 10.8 | 0.78 | 23.9 | <15     | <0.01    | 48.9 | 9.3  | 24.7 |
|    | DLZAC2610   | 2016 | 200.7 | 2.56  | 7.80 | 18.4 | 0.71 | 24.9 | <15     | <0.01    | 44.1 | 9.0  | 23.9 |
|    | DLZAC2610   | 2017 | 192.7 | 1.95  | 8.20 | 11.2 | 0.72 | 25.1 | 8.2     | <0.00139 | 51.5 | 9.4  | 24.5 |
|    | DLZAC2610   | 2018 | 188.6 | 2.17  | 7.70 | 11.2 | 0.83 | 28.5 | 15.7    | <0.00139 | 59.3 | 10.6 | 26.1 |
|    | DLZAC2610   | 2018 | 192.7 | 2.15  | 7.70 | 12.4 | 0.88 | 24.2 | <0.8188 | <0.00139 | 49.8 | 8.9  | 24.2 |
|    | DLZAC2610   | 2019 | 193.7 | 2.25  | 7.70 | <10  | 0.78 | 26.7 | 9.8     | <0.00139 | 62.4 | 11.3 | 26.0 |
|    | DLZAC2610   | 2020 | 195.4 | 1.98  | 7.70 | <10  | 0.78 | 22.6 | <15     | <0.01    | 50.7 | 9.2  | 25.4 |
| 18 | DLZAC2611   | 2012 | 194.6 | <0.02 | 8.04 | <10  | 3.12 | 78.3 | 15.2    | 0.0355   | 31.5 | 1.9  | 36.7 |
| IV | DLZAC2611   | 2013 | 169.6 | 1.35  | 7.84 | 11.0 | 2.94 | 71.6 | 25.3    | <0.01    | 27.3 |      | 30.3 |
|    | DLZAC2611   | 2014 | 181.4 | 1.38  | 7.80 | 10.1 | 3.70 | 70.9 | 30.2    | 0.0275   | 26.6 | 1.6  | 26.0 |
|    | DLZAC2611   | 2015 | 185.4 | 1.31  | 7.90 | <10  | 3.15 | 65.7 | 26.8    | 0.0401   | 27.3 | 1.5  | 26.9 |
|    | DLZAC2611   | 2016 | 186.6 | 1.44  | 7.80 | <10  | 3.55 | 63.9 | 32.2    | <0.01    | 24.9 | 1.4  | 23.7 |
|    | DLZAC2611   | 2017 | 186.2 | 1.33  | 8.00 | 15.0 | 3.29 | 79.7 | 24.6    | 0.0299   | 27.3 | 1.5  | 29.0 |
|    | DLZAC2611   | 2018 | 196.8 | 1.27  | 7.80 | 14.3 | 3.75 | 85.5 | 30.2    | 0.0365   | 27.6 | 1.6  | 26.1 |
|    | DLZAC2611   | 2018 | 186.9 | 1.50  | 8.00 | 12.6 | 3.55 | 93.2 | 22.4    | 0.0423   | 40.6 | 1.7  | 27.6 |
|    | DLZAC2611   | 2019 | 190.5 | 1.43  | 7.90 | 11.6 | 3.43 | 88.4 | 25.4    | 0.0413   | 29.2 | 1.6  | 28.9 |
|    | DLZAC2611   | 2020 | 188.7 | 1.41  | 8.10 | 10.8 | 3.52 | 71.9 | 25.7    | 0.0281   | 22.8 | 1.1  | 28.6 |
|    | DLZAC2611   | 2021 | 123.3 | 0.23  | 7.90 |      | 3.76 |      |         |          |      |      | 31.0 |
| 19 | DLZAC2612   | 2013 | 193.0 | 1.28  | 7.95 | <10  | 1.71 |      | 18.8    | <0.01    | 50.1 | 10.5 | 21.2 |
| IV | DLZAC2612   | 2013 | 187.1 | 1.41  | 7.90 | 11.0 | 1.69 | 42.4 | 22.5    | 0.0235   | 33.2 | 4.8  | 24.7 |
|    | DLZAC2612   | 2014 | 184.7 | 1.30  | 7.79 | 11.0 | 2.00 | 50.9 | 25.0    | 0.0203   | 42.1 | 6.0  | 22.8 |
|    | DLZAC2612   | 2015 | 195.0 | 1.39  | 7.90 | <10  | 1.75 | 49.7 | 22.7    | 0.028    | 44.5 | 5.1  | 24.0 |
|    | DLZAC2612   | 2016 | 202.9 | 1.51  | 7.80 | <10  | 1.72 | 42.4 | 24.8    | <0.01    | 38.7 | 5.1  | 22.1 |
|    | DLZAC2612   | 2017 | 200.7 | 1.31  | 7.80 | 15.0 | 1.68 | 52.9 | 21.7    | 0.0217   | 44.0 | 5.5  | 23.5 |
|    | DLZAC2612   | 2018 | 207.1 | 1.28  | 7.50 | 13.3 | 1.90 | 54.9 | 28.1    | 0.0256   | 42.3 | 5.7  | 24.8 |
|    | DLZAC2612   | 2018 | 199.0 | 1.36  | 8.00 | 13.1 | 1.70 | 60.8 | 20.6    | 0.0319   | 51.5 | 6.6  | 23.4 |
|    | DLZAC2612   | 2019 | 207.6 | 0.02  | 7.80 | 10.2 | 2.20 | 54.6 | 28.1    | <0.00139 | 41.3 | 5.1  | 20.6 |
|    | DLZAC2612   | 2020 | 195.4 | 1.25  | 8.00 | <10  | 1.99 | 52.4 | 23.9    | 0.0218   | 41.4 | 4.9  | 22.1 |
|    | DLZAC2612   | 2021 | 119.0 | 0.16  | 8.30 |      | 1.81 |      |         |          |      |      | 19.0 |
| 20 | DLZAC2613   | 2013 | 184.0 | 1.29  | 7.78 | 11.3 | 1.87 | 98.7 | 48.2    | <0.01    | 53.6 | 3.2  | 27.8 |
| IV | DLZAC2613   | 2013 | 180.2 | 1.50  | 7.84 | 13.4 | 1.81 | 74.1 | 54.7    | 0.0428   | 41.1 | 2.5  | 28.6 |
|    | DLZAC2613   | 2014 | 176.0 | 1.46  | 7.90 | 12.4 | 2.17 | 68.7 | 57.6    | 0.0423   | 40.5 | 2.2  | 26.5 |
|    | DLZAC2613   | 2015 | 188.7 | 1.42  | 7.60 | 13.3 | 1.93 | 75.4 | 47.9    | 0.0471   | 44.4 | 2.2  | 30.7 |

| N  | Well code   | Year | Alk   | NO3-N | pH   | Cl   | F    | Na   | SO4  | As       | Ca   | Mg   | T °C |
|----|-------------|------|-------|-------|------|------|------|------|------|----------|------|------|------|
|    | DLZAC2613   | 2017 | 183.0 | 1.30  | 7.80 | 17.8 | 1.88 | 76.0 | 58.6 | 0.0381   | 44.0 | 2.5  | 31.6 |
|    | DLZAC2613   | 2018 | 192.5 | 1.38  | 7.69 | 18.6 | 1.91 | 86.8 | 48.8 | 0.0482   | 49.3 | 3.0  | 30.0 |
|    | DLZAC2613   | 2018 | 188.9 | 1.49  | 7.90 | 21.4 | 1.97 | 86.4 | 49.5 | 0.0555   | 49.7 | 2.9  | 29.0 |
|    | DLZAC2613   | 2019 | 185.1 | 1.49  | 7.80 | 13.0 | 1.88 | 72.8 | 50.0 | 0.0465   | 41.3 | 2.3  | 29.1 |
|    | DLZAC2613   | 2020 | 185.4 | 1.53  | 7.70 | 12.3 | 1.99 | 67.6 | 53.3 | 0.0350   | 42.9 | 2.3  | 30.1 |
|    | DLZAC2613   | 2021 | 127.5 | 0.27  | 8.00 |      | 1.21 |      |      |          |      |      | 32.0 |
| 21 | DLZAC2616   | 2012 | 184.3 | 1.85  | 8.43 | 27.3 | 0.43 | 28.3 | 34.1 | <0.01    | 38.7 | 38.6 | 26.9 |
| I  | DLZAC2616   | 2013 | 199.0 | 1.90  | 8.12 | 23.5 | 0.47 | 21.1 | 27.7 | <0.01    | 27.8 | 27.6 | 26.7 |
|    | DLZAC2616   | 2014 | 189.4 | 1.88  | 8.20 | 23.5 | 0.51 | 26.2 | 24.7 | <0.01    | 36.7 | 36.5 | 25.6 |
|    | DLZAC2616   | 2015 | 197.9 | 1.62  | 8.20 | 21.4 | 0.44 | 15.0 | 23.0 | <0.01    | 21.7 | 20.5 | 25.1 |
|    | DLZAC2616   | 2016 | 199.5 | 1.88  | 8.30 | 20.0 | 0.43 | 26.8 | 30.1 | <0.01    | 32.4 | 27.6 | 25.4 |
|    | DLZAC2616   | 2017 | 200.7 | 1.19  | 8.30 | 27.1 | 0.44 | 34.1 | 23.1 | <0.00139 | 40.6 | 36.8 | 26.5 |
|    | DLZAC2616   | 2018 | 193.7 | 2.00  | 8.20 | 26.0 | 0.47 | 31.1 | 31.1 | <0.00139 | 38.2 | 34.9 | 28.0 |
|    | DLZAC2616   | 2018 | 206.0 | 1.53  | 8.00 | 21.2 | 0.46 | 22.8 | 23.7 | <0.00139 | 27.2 | 24.7 | 24.5 |
|    | DLZAC2616   | 2019 | 196.7 | 1.25  | 7.70 | 23.1 | 0.34 | 50.9 | 23.1 | 0.0174   | 23.1 | 26.5 | 28.2 |
|    | DLZAC2616   | 2020 | 196.5 | 1.94  | 7.80 | 22.5 | 0.42 | 33.1 | 25.1 | <0.01    | 36.6 | 32.5 | 26.9 |
| 22 | DLZAC2620M1 | 2012 | 265.0 | <0.02 | 7.58 | 25.8 | 1.08 | 50.0 | 69.9 | <0.01    | 35.9 | 29.0 | 28.6 |
| I  | DLZAC2620M1 | 2013 | 264.7 | <0.02 | 7.82 | 20.1 | 1.21 | 64.0 | 84.2 | <0.01    | 33.2 | 26.5 | 30.1 |
|    | DLZAC2620M1 | 2014 | 261.6 | 0.02  | 7.97 | 22.8 | 1.29 | 63.6 | 75.8 | <0.01    | 35.5 | 26.9 | 28.5 |
|    | DLZAC2620M1 | 2015 | 253.1 | <0.02 | 7.80 | 30.6 | 1.09 | 75.1 | 65.0 | <0.01    | 40.9 | 31.1 | 21.6 |
|    | DLZAC2620M1 | 2016 | 265.8 | 0.03  | 8.00 | 31.1 | 1.19 | 77.8 | 63.7 | <0.01    | 43.7 | 30.2 | 27.0 |
|    | DLZAC2620M1 | 2017 | 273.5 | 0.10  | 8.00 | 32.3 | 1.15 | 70.0 | 71.8 | <0.00139 | 39.7 | 30.0 | 28.4 |
|    | DLZAC2620M1 | 2018 | 273.7 | 0.00  | 7.90 | 28.6 | 1.23 | 75.6 | 68.5 | <0.00139 | 39.2 | 31.9 | 27.4 |
|    | DLZAC2620M1 | 2018 | 275.7 | 0.08  | 7.80 | 31.6 | 1.17 | 88.6 | 54.6 | <0.00139 | 49.3 | 36.3 | 26.8 |
|    | DLZAC2620M1 | 2019 | 271.4 | 0.03  | 7.60 | 24.1 | 1.26 | 73.9 | 78.2 | <0.00139 | 43.5 | 34.5 | 26.7 |
|    | DLZAC2620M1 | 2020 | 270.8 | <0.02 | 7.60 | 24.1 | 1.23 | 66.5 | 70.3 | <0.01    | 40.3 | 29.5 | 29.5 |
| 23 | DLZAC2621   | 2012 | 152.3 | 2.23  | 8.18 | <10  | 0.94 | 38.8 | 21.8 | <0.01    | 49.1 | 3.3  | 24.5 |
| I  | DLZAC2621   | 2013 | 155.2 | 2.39  | 8.36 | <10  | 0.99 | 31.1 | 15.6 | <0.01    | 36.7 | 2.5  | 24.6 |
|    | DLZAC2621   | 2014 | 149.0 | 2.03  | 7.66 | <10  | 0.97 | 34.3 | 16.4 | <0.01    | 42.2 | 2.8  | 24.5 |
|    | DLZAC2621   | 2015 | 154.8 | 2.28  | 7.80 | <10  | 1.02 | 31.2 | 18.0 | <0.01    | 40.6 | 2.8  | 25.2 |
|    | DLZAC2621   | 2016 | 156.6 | 1.90  | 8.00 | <10  | 0.95 | 24.0 | 21.2 | <0.01    | 30.3 | 2.0  | 26.0 |
|    | DLZAC2621   | 2017 | 157.0 | 2.49  | 7.80 | 9.4  | 0.90 | 38.3 | 14.7 | 0.0117   | 45.6 | 2.9  | 27.0 |
|    | DLZAC2621   | 2018 | 154.5 | 2.56  | 7.60 | 10.6 | 0.87 | 36.2 | 17.4 | 0.0162   | 43.8 | 2.7  | 24.5 |
|    | DLZAC2621   | 2018 | 149.3 | 2.46  | 8.00 | <10  | 0.98 | 36.2 | 20.0 | 0.0176   | 41.8 | 3.0  | 23.4 |
|    | DLZAC2621   | 2020 | 157.6 | 2.63  | 7.60 | <10  | 0.95 | 39.4 | <15  | <0.01    | 46.6 | 2.8  | 24.7 |
|    | DLZAC2621   | 2021 | 112.2 | 0.29  | 7.85 |      | 2.40 |      |      |          |      |      | 17.0 |
| 24 | DLZAC2622   | 2012 | 192.0 | 1.00  | 8.47 | <10  | 0.57 | 53.9 | 42.6 | <0.01    | 32.3 | 21.8 | 26.5 |
| I  | DLZAC2622   | 2013 | 212.9 | 1.11  | 7.82 | <10  | 0.54 | 52.1 | 34.1 | <0.01    | 30.3 | 20.6 | 28.1 |
|    | DLZAC2622   | 2014 | 213.2 | 1.17  | 8.00 | 12.7 | 0.47 | 43.3 | 30.0 | <0.01    | 27.8 | 18.3 | 26.1 |
|    | DLZAC2622   | 2015 | 200.7 | 1.21  | 7.90 | 14.1 | 0.48 | 44.5 | 27.4 | 0.0135   | 28.4 | 19.5 | 24.2 |
|    | DLZAC2622   | 2016 | 211.1 | 0.93  | 7.90 | 14.8 | 0.47 | 32.6 | 35.2 | <0.01    | 22.7 | 15.9 | 26.0 |
|    | DLZAC2622   | 2017 | 199.7 | 1.28  | 8.20 | 27.1 | 0.53 | 61.7 | 38.7 | 0.0168   | 33.4 | 21.0 | 26.2 |
|    | DLZAC2622   | 2018 | 203.0 | 1.65  | 7.80 | 26.5 | 0.53 | 55.7 | 41.8 | 0.0114   | 38.0 | 25.1 | 28.6 |
|    | DLZAC2622   | 2018 | 231.1 | 1.61  | 7.90 | 35.0 | 0.40 | 48.1 | 38.0 | <0.00139 | 28.0 | 18.6 | 18.9 |
|    | DLZAC2622   | 2019 | 199.1 | 1.76  | 7.90 | 26.5 | 0.52 | 56.7 | 40.6 | 0.0185   | 25.4 | 22.9 | 26.9 |
|    | DLZAC2622   | 2020 | 203.1 | 0.06  | 8.10 | 33.8 | 0.40 | 53.9 | 46.3 | 0.0136   | 34.9 | 22.8 | 25.3 |
|    | DLZAC2622   | 2021 | na    | 1.96  | 7.90 |      |      |      | 45.7 | 0.0165   |      |      | 26.0 |
| 25 | DLZAC2623M1 | 2013 | 207.0 | 1.36  | 6.96 | 13.4 | 0.41 | 50.0 | 32.5 | <0.01    | 25.9 | 26.2 | 25.9 |
| I  | DLZAC2623M1 | 2013 | 190.8 | 1.43  | 7.84 | 12.4 | 0.40 | 48.2 | 27.9 | <0.01    | 22.3 | 20.3 | 25.7 |
|    | DLZAC2623M1 | 2014 | 190.1 | 1.48  | 8.07 | <10  | 0.52 | 52.3 | 34.5 | 0.0168   | 23.5 | 23.7 | 26.4 |
|    | DLZAC2623M1 | 2015 | 202.5 | 1.42  | 7.80 | <10  | 0.45 | 56.1 | 28.1 | 0.0181   | 25.8 | 19.7 | 27.8 |
|    | DLZAC2623M1 | 2016 | 197.5 | 1.76  | 7.90 | 11.8 | 0.41 | 51.0 | 26.5 | 0.0111   | 25.5 | 20.7 | 26.8 |

| N  | Well code   | Year | Alk   | NO3-N | pH   | Cl   | F    | Na   | SO4  | As       | Ca   | Mg   | T °C |
|----|-------------|------|-------|-------|------|------|------|------|------|----------|------|------|------|
|    | DLZAC2623M1 | 2017 | 208.0 | 0.90  | 8.10 | 17.8 | 0.40 | 58.3 | 21.8 | 0.0171   | 29.7 | 25.5 | 25.9 |
|    | DLZAC2623M1 | 2018 | 208.1 | 1.52  | 8.00 | 14.8 | 0.46 | 62.4 | 31.9 | 0.0185   | 26.6 | 23.6 | 29.1 |
|    | DLZAC2623M1 | 2018 | 220.2 | 1.39  | 7.90 | 12.3 | 0.46 | 45.0 | 27.4 | 0.0127   | 18.7 | 16.8 | 26.2 |
|    | DLZAC2623M1 | 2019 | 200.3 | 1.45  | 7.90 | 11.6 | 0.44 | 60.7 | 28.1 | 0.0254   | 17.4 | 20.9 | 28.7 |
|    | DLZAC2623M1 | 2020 | 207.6 | 1.50  | 8.00 | 11.3 | 0.44 | 57.3 | 29.1 | 0.0202   | 24.1 | 19.3 | 29.0 |
|    | DLZAC2623M1 | 2021 | n/a   | 1.43  | 7.70 |      |      |      | 25.9 | 0.0213   |      |      | 28.0 |
| 26 | DLZAC2627   | 2012 | 183.0 | 1.48  | 8.47 | 12.9 | 1.20 | 85.5 | 33.5 | <0.01    | 26.3 | 1.9  | 24.0 |
| I  | DLZAC2627   | 2013 | 198.0 | 1.62  | 8.06 | 11.0 | 1.23 | 90.1 | 27.4 | <0.01    | 24.3 | 2.4  | 25.6 |
|    | DLZAC2627   | 2014 | 188.1 | 1.73  | 8.00 | 11.2 | 1.31 | 77.5 | 25.1 | <0.01    | 23.7 | 2.3  | 25.1 |
|    | DLZAC2627   | 2015 | 200.9 | 3.42  | 8.20 | 12.8 | 1.12 | 89.2 | 21.6 | <0.01    | 36.3 | 3.3  | 26.0 |
|    | DLZAC2627   | 2016 | 198.7 | 1.32  | 7.70 | 11.5 | 1.20 | 58.2 | 27.7 | <0.01    | 18.4 | 1.6  | 26.9 |
|    | DLZAC2627   | 2017 | 190.3 | 2.04  | 8.10 | 22.0 | 1.52 | 50.0 | 23.8 | 0.0675   | 44.5 | 4.5  | 21.0 |
|    | DLZAC2627   | 2018 | 206.8 | 2.15  | 8.09 | 19.6 | 1.27 | 96.5 | 29.1 | 0.0108   | 32.5 | 2.8  | 26.7 |
|    | DLZAC2627   | 2018 | 185.5 | 2.61  | 7.80 | 15.7 | 1.35 | 72.6 | 27.8 | 0.0157   | 28.0 | 2.5  | 24.0 |
|    | DLZAC2627   | 2019 | 193.7 | 2.34  | 8.00 | 14.9 | 1.30 | 85.5 | 26.2 | <0.00139 | 30.0 | 2.4  | 25.7 |
|    | DLZAC2627   | 2020 | 195.4 | 2.66  | 8.00 | 14.3 | 1.30 | 70.2 | 30.0 | <0.01    | 32.8 | 2.7  | 23.7 |
| 27 | DLZAC2628   | 2012 | 199.3 | 2.44  | 7.50 | 11.3 | 0.86 | 43.1 | <15  | <0.01    | 30.3 | 2.9  | 25.5 |
| I  | DLZAC2628   | 2013 | 183.1 | 1.45  | 7.88 | 10.1 | 1.11 | 61.0 | 20.3 | 0.0285   | 41.6 | 4.6  | 26.7 |
|    | DLZAC2628   | 2014 | 182.2 | 1.50  | 7.90 | 10.7 | 1.17 | 48.4 | 17.7 | 0.0146   | 36.6 | 4.0  | 24.8 |
|    | DLZAC2628   | 2015 | 180.4 | 1.56  | 7.10 | 11.9 | 1.13 | 49.9 | 18.4 | 0.0260   | 35.0 | 3.6  | 24.9 |
|    | DLZAC2628   | 2016 | 182.9 | 1.05  | 8.00 | 10.6 | 1.15 | 33.6 | 23.8 | <0.01    | 27.2 | 2.6  | 26.1 |
|    | DLZAC2628   | 2017 | 191.4 | 1.65  | 8.20 | 16.4 | 1.10 | 50.0 | 14.3 | 0.0181   | 39.9 | 4.1  | 23.7 |
|    | DLZAC2628   | 2018 | 186.6 | 1.64  | 7.90 | 14.3 | 1.15 | 55.5 | 23.8 | 0.0235   | 43.2 | 4.4  | 27.6 |
|    | DLZAC2628   | 2018 | 190.7 | 1.70  | 8.10 | 21.4 | 1.16 | 61.1 | 21.6 | 0.0254   | 40.1 | 4.3  | 25.0 |
|    | DLZAC2628   | 2019 | 178.7 | 1.62  | 7.80 | 13.0 | 1.09 | 66.4 | 16.4 | 0.0280   | 39.0 | 3.6  | 25.5 |
|    | DLZAC2628   | 2020 | 186.5 | 1.63  | 7.70 | 12.8 | 1.14 | 51.3 | 16.3 | 0.0217   | 38.7 | 3.6  | 26.1 |
|    | DLZAC2628   | 2021 | 130.9 | 0.27  | 8.10 |      | 1.98 |      |      |          |      |      | 26.0 |
| 28 | DLZAC2629   | 2012 | 179.2 | 2.54  | 7.91 | 10.9 | 1.04 | 41.1 | 18.3 | <0.01    | 48.3 | 3.5  | 24.1 |
| I  | DLZAC2629   | 2013 | 175.1 | 4.15  | 7.65 | 11.5 | 1.01 | 42.6 | 18.1 | 0.0229   | 54.0 | 4.6  | 25.7 |
|    | DLZAC2629   | 2014 | 183.2 | 2.09  | 7.60 | 10.2 | 1.03 | 36.9 | 16.2 | <0.01    | 48.2 | 4.0  | 23.6 |
|    | DLZAC2629   | 2015 | 179.3 | 2.37  | 7.90 | 27.4 | 1.00 | 49.4 | 17.3 | <0.01    | 50.3 | 5.8  | 23.4 |
|    | DLZAC2629   | 2016 | 183.6 | 1.67  | 7.60 | <10  | 0.98 | 26.7 | 20.4 | <0.01    | 35.3 | 2.5  | 25.4 |
|    | DLZAC2629   | 2017 | 205.9 | 2.48  | 8.30 | 17.3 | 0.98 | 39.6 | 14.5 | <0.00139 | 50.5 | 3.5  | 22.0 |
|    | DLZAC2629   | 2018 | 183.5 | 2.48  | 7.50 | 45.9 | 1.11 | 44.9 | 21.6 | 0.0221   | 55.7 | 4.0  | 24.5 |
|    | DLZAC2629   | 2018 | 182.5 | 2.13  | 7.50 | 14.3 | 1.15 | 44.4 | 20.6 | 0.0228   | 51.1 | 3.7  | 24.0 |
|    | DLZAC2629   | 2019 | 181.9 | 2.27  | 7.80 | 11.6 | 1.15 | 58.2 | 17.1 | 0.0408   | 50.9 | 3.2  | 25.1 |
|    | DLZAC2629   | 2020 | 185.4 | 2.11  | 7.70 | 10.8 | 1.13 | 45.9 | 17.6 | 0.0196   | 49.3 | 3.1  | 23.0 |
|    | DLZAC2629   | 2021 | 131.8 | 0.28  | 8.10 |      | 0.93 |      |      |          |      |      | 26.0 |
| 29 | DLZAC2630   | 2012 | 189.4 | 1.16  | 8.08 | <10  | 1.09 | 38.1 | 27.5 | <0.01    | 45.1 | 4.2  | 28.6 |
| I  | DLZAC2630   | 2013 | 183.1 | 1.23  | 7.65 | <10  | 1.02 | 45.9 | 21.0 | <0.01    | 52.0 | 5.6  | 31.7 |
|    | DLZAC2630   | 2014 | 191.1 | 1.28  | 7.70 | <10  | 1.09 | 36.1 | 17.2 | 0.0164   | 47.2 | 5.3  | 27.3 |
|    | DLZAC2630   | 2015 | 188.1 | 1.35  | 8.10 | <10  | 1.03 | 38.1 | 18.6 | 0.0146   | 47.3 | 5.0  | 27.2 |
|    | DLZAC2630   | 2016 | 192.2 | 0.92  | 7.60 | <10  | 1.03 | 25.7 | 20.8 | <0.01    | 34.5 | 3.8  | 28.8 |
|    | DLZAC2630   | 2017 | 201.8 | 1.34  | 7.90 | 11.2 | 1.02 | 38.9 | 16.4 | 0.0140   | 51.8 | 4.8  | 28.3 |
|    | DLZAC2630   | 2018 | 194.8 | 1.38  | 7.70 | 11.2 | 1.06 | 42.4 | 24.0 | 0.0198   | 58.2 | 5.9  | 29.9 |
|    | DLZAC2630   | 2018 | 186.6 | 1.39  | 7.60 | 12.4 | 1.06 | 41.0 | 22.3 | 0.0216   | 54.0 | 5.7  | 30.0 |
|    | DLZAC2630   | 2019 | 189.4 | 1.45  | 7.80 | <10  | 0.99 | 50.4 | 16.6 | 0.0259   | 54.1 | 5.0  | 30.3 |
|    | DLZAC2630   | 2020 | 195.4 | 1.33  | 7.70 | <10  | 1.15 | 39.8 | 19.7 | 0.0135   | 51.5 | 5.0  | 28.7 |
|    | DLZAC2630   | 2021 | 190.3 | 1.33  | 7.20 | <10  | 1.14 | 41.2 | 17.7 | 0.0239   | 55.1 | 5.9  | 29.0 |
| 30 | DLZAC2632   | 2012 | 162.6 | 3.40  | 8.08 | 12.4 | 0.89 | 33.5 | 36.2 | <0.01    | 36.2 | 9.2  | 31.9 |
| I  | DLZAC2632   | 2013 | 165.2 | 3.31  | 7.79 | 10.5 | 0.89 | 37.8 | 26.4 | 0.0226   | 39.4 | 10.8 | 33.2 |
|    | DLZAC2632   | 2014 | 162.6 | 3.40  | 7.90 | 12.4 | 0.94 | 37.5 | 26.2 | 0.0264   | 46.0 | 12.5 | 33.7 |

| N         | Well code   | Year | Alk   | NO3-N | pH   | Cl    | F    | Na   | SO4   | As       | Ca    | Mg   | T °C |
|-----------|-------------|------|-------|-------|------|-------|------|------|-------|----------|-------|------|------|
| 31<br>IV  | DLZAC2632   | 2015 | 163.8 | 3.60  | 7.70 | <10   | 0.98 | 23.8 | 25.6  | 0.0131   | 25.3  | 6.6  | 31.6 |
|           | DLZAC2632   | 2016 | 162.8 | 3.71  | 7.60 | 11.3  | 0.93 | 36.7 | 29.0  | 0.0242   | 45.5  | 10.3 | 32.4 |
|           | DLZAC2632   | 2017 | 165.4 | 2.09  | 7.20 | 17.3  | 0.87 | 38.4 | 26.6  | 0.0336   | 46.1  | 12.8 | 29.0 |
|           | DLZAC2632   | 2018 | 166.9 | 1.53  | 8.40 | 12.5  | 0.76 | 43.0 | 27.0  | 0.0354   | 42.8  | 11.5 | 27.6 |
|           | DLZAC2632   | 2018 | 171.1 | 0.02  | 8.00 | 11.8  | 0.84 | 26.2 | 20.7  | 0.0198   | 27.9  | 8.5  | 19.1 |
|           | DLZAC2632   | 2019 | 152.9 | 0.21  | 8.20 | 9.2   | 0.63 | 37.1 | 22.3  | 0.0262   | 21.6  | 9.2  | 25.8 |
|           | DLZAC2632   | 2020 | 168.7 | 1.60  | 8.10 | <10   | 1.90 | 28.1 | <15   | <0.01    | 39.3  | 3.0  | 24.6 |
|           | DLZAC2632   | 2021 | 165.6 | 3.58  | 7.40 | 14.1  | 0.91 | 36.5 | 20.5  | 0.0335   | 43.9  | 12.4 | 29.0 |
|           | DLZAC2633   | 2012 | 170.8 | 1.58  | 8.21 | <10   | 1.02 | 46.8 | <15   | <0.01    | 36.3  | 3.0  | 26.0 |
|           | DLZAC2633   | 2013 | 164.3 | 1.54  | 7.74 | <10   | 1.12 | 42.0 | <15   | <0.01    | 32.5  | 2.8  | 28.4 |
| 32<br>IV  | DLZAC2633   | 2014 | 164.8 |       | 7.90 | <10   | 1.25 | 37.4 | <15   | <0.01    | 32.6  | 2.7  | 24.8 |
|           | DLZAC2633   | 2015 | 178.5 | 1.43  | 8.00 | <10   | 1.15 | 27.0 | <15   | <0.01    | 22.3  | 1.8  | 25.6 |
|           | DLZAC2633   | 2016 | 176.9 | 1.29  | 7.70 | 11.3  | 1.09 | 40.8 | <15   | <0.01    | 28.9  | 2.6  | 25.7 |
|           | DLZAC2633   | 2017 | 171.2 | 1.32  | 8.10 | 9.4   | 1.22 | 42.4 | 8.5   | <0.00139 | 34.4  | 2.8  | 26.7 |
|           | DLZAC2633   | 2018 | 168.1 | 1.51  | 7.80 | <10   | 1.29 | 49.0 | 16.0  | <0.00139 | 40.3  | 3.1  | 30.1 |
|           | DLZAC2633   | 2018 | 167.1 | 1.52  | 7.70 | 9.5   | 1.31 | 39.3 | 5.0   | <0.00139 | 32.9  | 2.6  | 25.6 |
|           | DLZAC2633   | 2019 | 171.2 | 1.52  | 7.80 | <10   | 1.22 | 49.4 | 6.1   | 0.0116   | 39.7  | 3.4  | 27.2 |
|           | DLZAC2633   | 2020 | 169.8 | 1.29  | 7.90 | <10   | 1.24 | 39.4 | <15   | <0.01    | 34.7  | 2.8  | 25.8 |
|           | DLZAC2633   | 2021 | 110.5 | 0.13  | 8.02 |       | 1.29 |      |       |          |       |      | 27.0 |
|           | DLZAC2634   | 2012 | 180.6 | 0.96  | 8.09 | 108.9 | 2.55 | 54.6 | 15.7  | <0.01    | 34.2  | 4.7  | 27.3 |
| 33<br>I   | DLZAC2634   | 2013 | 179.1 | 0.95  | 7.70 | <10   | 2.40 | 42.8 | <15   | <0.01    | 26.0  | 3.6  | 30.0 |
|           | DLZAC2634   | 2014 | 178.7 | 0.96  | 7.60 | <10   | 2.71 | 55.0 | 17.4  | <0.01    | 37.2  | 5.3  | 26.5 |
|           | DLZAC2634   | 2015 | 184.3 | 0.87  | 7.90 | <10   | 2.49 | 31.8 | 31.5  | <0.01    | 21.5  | 2.8  | 26.0 |
|           | DLZAC2634   | 2016 | 187.7 | 0.96  | 7.60 | <10   | 2.72 | 50.4 | <15   | <0.01    | 27.1  | 3.9  | 24.7 |
|           | DLZAC2634   | 2017 | 183.5 | 0.82  | 8.00 | 11.7  | 2.70 | 51.5 | 13.8  | 0.01065  | 33.5  | 4.5  | 25.6 |
|           | DLZAC2634   | 2018 | 178.4 | 1.01  | 7.80 | <10   | 2.75 | 57.9 | 19.7  | <0.00139 | 37.2  | 4.9  | 30.2 |
|           | DLZAC2634   | 2018 | 179.4 | 1.02  | 7.70 | 9.0   | 2.77 | 46.5 | 8.9   | <0.00139 | 30.8  | 4.0  | 27.7 |
|           | DLZAC2634   | 2019 | 179.8 | 0.90  | 7.60 | <10   | 2.62 | 49.2 | 8.8   | <0.00139 | 31.5  | 4.2  | 23.0 |
|           | DLZAC2634   | 2020 | 183.2 | 0.86  | 7.90 | <10   | 2.61 | 44.9 | <15   | <0.01    | 31.8  | 4.3  | 28.2 |
|           | DLZAC2635M1 | 2013 | 100.0 | 5.10  | 7.19 | 22.8  | 1.50 | 50.0 | 32.5  | <0.01    | 45.0  | 4.9  | 27.6 |
| 34<br>I   | DLZAC2635M1 | 2013 | 175.1 | 4.60  | 7.39 | 18.7  | 1.40 | 48.8 | 26.8  | <0.01    | 43.2  |      | 30.8 |
|           | DLZAC2635M1 | 2014 | 169.7 | 3.96  | 7.63 | 19.0  | 1.70 | 43.8 | 32.1  | 0.0145   | 43.3  | 4.2  | 27.9 |
|           | DLZAC2635M1 | 2015 | 167.1 | 4.17  | 7.70 | 21.5  | 1.53 | 50.4 | 30.4  | <0.01    | 48.3  | 4.8  | 23.7 |
|           | DLZAC2635M1 | 2016 | 179.9 | 5.58  | 7.70 | 18.6  | 1.59 | 46.3 | 31.9  | <0.01    | 46.9  | 4.2  | 26.3 |
|           | DLZAC2635M1 | 2017 | 183.0 | 4.87  | 8.10 | 24.3  | 1.46 | 35.1 | 25.3  | 0.0149   | 38.4  | 3.9  | 27.6 |
|           | DLZAC2635M1 | 2018 | 182.5 | 5.54  | 8.10 | 25.5  | 1.63 | 51.6 | 29.8  | 0.0193   | 46.5  | 4.9  | 28.8 |
|           | DLZAC2635M1 | 2018 | 178.8 | 5.62  | 8.10 | 24.8  | 1.60 | 59.9 | 26.7  | 0.0270   | 58.7  | 5.8  | 27.0 |
|           | DLZAC2635M1 | 2019 | 170.6 | 6.34  | 8.10 | 21.2  | 1.59 | 50.5 | 27.8  | 0.0207   | 51.4  | 5.3  | 25.6 |
|           | DLZAC2635M1 | 2020 | 176.5 | 5.96  | 8.10 | 19.7  | 1.56 | 41.4 | 24.3  | 0.0173   | 44.2  | 4.5  | 26.1 |
|           | DLZAC2640   | 2012 | 153.6 | 1.03  | 8.12 | <10   | 0.43 | 24.8 | <15   | <0.01    | 20.7  | 3.3  | 24.2 |
| 35<br>III | DLZAC2640   | 2013 | 146.3 | 1.14  | 7.70 | <10   | 2.37 | 54.2 | 15.5  | <0.01    | 26.5  | 3.8  | 26.3 |
|           | DLZAC2640   | 2014 | 143.6 | 1.34  | 7.88 | <10   | 2.08 | 49.0 | 16.7  | <0.01    | 28.3  | 4.0  | 23.8 |
|           | DLZAC2640   | 2015 | 159.0 | 1.30  | 7.80 | <10   | 2.29 | 42.2 | <15   | <0.01    | 26.0  | 3.8  | 23.4 |
|           | DLZAC2640   | 2016 | 162.0 | 0.91  | 8.10 | <10   | 2.49 | 57.9 | 17.1  | <0.01    | 32.3  | 4.8  | 24.5 |
|           | DLZAC2640   | 2017 | 147.7 | 1.75  | 7.60 | 9.8   | 1.78 | 38.2 | 11.2  | 0.0111   | 28.7  | 4.5  | 24.7 |
|           | DLZAC2640   | 2018 | 159.9 | 1.21  | 7.90 | <10   | 2.55 | 55.3 | 6.8   | 0.0102   | 27.9  | 4.3  | 25.9 |
|           | DLZAC2640   | 2018 | 157.6 | 1.33  | 7.50 | <10   | 2.07 | 52.7 | 13.0  | 0.0125   | 32.7  | 4.6  | 22.3 |
|           | DLZAC2640   | 2020 | 185.4 | 1.52  | 8.40 | 68.0  | 2.15 | 90.5 | 15.3  | <0.01    | 26.1  | 4.3  | 25.6 |
|           | DLZAC2640   | 2021 | 95.2  | 0.29  | 7.70 |       | 2.41 |      |       |          |       |      | 24.0 |
|           | DLZAC2641   | 2013 | 250.7 | 3.24  | 7.03 | 31.3  | 0.55 |      |       | <0.01    | 298.1 | 81.5 | 21.5 |
| III       | DLZAC2641   | 2013 | 212.1 | 5.90  | 7.12 | 21.9  | 0.55 | 65.7 | 465.7 | <0.01    | 186.2 | 38.6 | 26.1 |
|           | DLZAC2641   | 2014 | 231.3 | 2.09  | 7.17 | 17.2  | 0.56 | 78.7 | 787.1 | 0.0165   | 259.6 | 52.2 | 22.2 |

| N  | Well code | Year | Alk   | NO3-N | pH   | Cl     | F    | Na    | SO4   | As       | Ca    | Mg   | T °C |
|----|-----------|------|-------|-------|------|--------|------|-------|-------|----------|-------|------|------|
| 36 | DLZAC2641 | 2015 | 193.9 | 1.86  | 7.40 | 14.8   | 0.43 | 80.7  | 587.2 | <0.01    | 322.3 | 52.4 | 19.3 |
|    | DLZAC2641 | 2016 | 231.1 | 2.38  | 8.70 | 18.2   | 0.51 | 56.5  | 578.9 | 0.0160   | 197.3 | 29.7 | 23.0 |
|    | DLZAC2641 | 2017 | 226.7 | 1.78  | 7.90 | 20.6   | 0.51 | 87.3  | 610.8 | 0.0150   | 258.0 | 61.7 | 22.5 |
|    | DLZAC2641 | 2018 | 235.8 | 3.02  | 7.10 | 28.6   | 0.54 | 127.9 | 948.3 | 0.0206   | 407.5 | 85.2 | 24.9 |
|    | DLZAC2641 | 2018 | 215.8 | 1.98  | 8.90 | 24.6   | 0.55 | 102.8 | 941.7 | 0.03084  | 381.2 | 64.1 | 7.0  |
|    | DLZAC2641 | 2020 | 179.6 | 6.06  | 7.40 | 12.2   | 0.48 | 67.3  | 433.9 | 0.0182   | 180.2 | 30.5 | 21.9 |
|    | DLZAC2641 | 2021 | 238.7 | 5.59  | 6.90 | 34.2   | 0.51 | 112.8 | 910.4 | 0.0206   | 337.4 | 82.5 | 26.0 |
|    | DLZAC2642 | 2013 | 212.8 | 3.41  | 7.57 | 17.9   | 0.34 | 13.5  | 90.3  | 0.0176   | 135.9 | 4.8  | 16.1 |
|    | DLZAC2642 | 2013 | 166.7 | <0.02 | 7.74 | 20.4   | 0.23 | 13.1  | 147.1 | <0.01    | 104.2 | 4.0  | 20.3 |
|    | DLZAC2642 | 2014 | 190.0 |       | 7.49 | 18.9   | 0.28 | 12.6  | 137.8 | <0.01    | 121.0 | 3.6  | 13.7 |
| 37 | DLZAC2642 | 2015 | 195.0 | 3.70  | 7.60 | 18.4   | 0.22 | 14.1  | 96.6  | 0.0172   | 148.0 | 4.6  | 12.7 |
|    | DLZAC2642 | 2016 | 155.4 | 1.82  | 7.80 | 17.8   | 0.22 | 12.0  | 123.1 | <0.01    | 100.7 | 3.8  | 18.9 |
|    | DLZAC2642 | 2017 | 219.4 | 2.22  | 7.70 | 22.9   | 0.23 | 13.5  | 133.0 | 0.0136   | 131.7 | 4.6  | 22.3 |
|    | DLZAC2642 | 2018 | 198.9 | 2.99  | 7.60 | 19.9   | 0.27 | 15.4  | 125.0 | 0.0245   | 152.6 | 5.0  | 23.6 |
|    | DLZAC2642 | 2018 | 204.9 | 2.61  | 7.70 | 22.2   | 0.26 | 16.8  | 135.0 | 0.02541  | 158.4 | 4.4  | 12.3 |
|    | DLZAC2642 | 2020 | 163.2 | 1.55  | 7.50 | 18.1   | 0.26 | 13.5  | 133.8 | <0.01    | 95.3  | 4.0  | 25.5 |
|    | DLZAC2643 | 2013 | 218.3 | 2.69  | 7.44 | 20.8   | 0.35 | 11.0  | 187.3 | 0.0269   | 146.1 | 8.0  | 21.5 |
|    | DLZAC2643 | 2013 | 214.1 | 2.82  | 7.14 | 20.9   | 0.33 | 11.9  | 189.8 | 0.0519   | 158.7 | 7.7  | 25.4 |
|    | DLZAC2643 | 2014 | 230.3 | 2.11  | 6.82 | 15.7   | 0.38 | 10.2  | 92.6  | 0.0236   | 114.9 | 6.2  | 18.0 |
|    | DLZAC2643 | 2015 | 222.6 | 2.81  | 7.40 | 19.3   | 0.31 | 11.8  | 137.0 | 0.0355   | 132.3 | 7.7  | 22.9 |
| 38 | DLZAC2643 | 2016 | 213.8 | 2.16  | 7.20 | 20.7   | 0.23 | 44.5  | 187.4 | 0.0502   | 191.3 | 12.6 | 27.7 |
|    | DLZAC2643 | 2017 | 234.0 | 2.23  | 7.70 | 22.9   | 0.29 | 11.2  | 149.7 | 0.0377   | 151.1 | 7.9  | 25.9 |
|    | DLZAC2643 | 2018 | 218.3 | 2.87  | 7.10 | 20.9   | 0.54 | 13.0  |       | 0.0470   | 188.7 | 9.0  | 26.7 |
|    | DLZAC2643 | 2018 | 213.6 | 2.86  | 7.40 | 25.6   | 0.31 | 14.1  | 197.3 | 0.05289  | 182.9 | 7.6  | 19.3 |
|    | DLZAC2643 | 2020 | 222.3 | 2.79  | 7.80 | 19.1   | 0.33 | <10   | 150.1 | 0.0347   | 162.0 | 7.0  | 24.4 |
|    | DLZAC2643 | 2021 | 221.5 | 2.70  | 6.60 | 23.2   | 0.31 | 11.7  | 180.5 | 0.0413   | 178.3 | 7.5  | 25.0 |
|    | DLZAC2644 | 2013 | 324.7 | 1.60  | 7.30 | 258.1  | 0.99 | 242.0 | 119.7 | <0.01    | 116.3 | 13.5 | 19.2 |
|    | DLZAC2644 | 2013 | 344.4 | 1.34  | 6.92 | 1053.9 | 0.99 | 710.7 | 459.6 | 0.0753   | 244.6 | 35.7 | 22.4 |
|    | DLZAC2644 | 2014 | 310.1 | 1.48  | 7.18 | 248.9  | 0.98 | 222.2 | 201.1 | 0.0216   | 112.4 | 11.9 | 13.1 |
|    | DLZAC2644 | 2015 | 356.2 | 3.85  | 7.20 | 1032.6 | 1.07 |       | 372.2 | 0.1025   | 259.6 | 34.2 | 19.1 |
| 39 | DLZAC2644 | 2016 | 379.1 | 2.73  | 7.40 | 843.4  | 1.04 | 848.2 | 445.9 | 0.1211   | 299.7 | 38.7 | 32.3 |
|    | DLZAC2644 | 2017 | 377.5 | 3.04  | 7.30 | 1071.6 | 1.14 | 704.0 | 417.0 | 0.0613   | 239.3 | 31.1 | 29.9 |
|    | DLZAC2644 | 2018 | 360.8 | 3.59  | 7.00 |        | 1.24 | 788.4 | 430.7 | 0.1065   | 278.0 | 33.1 | 30.7 |
|    | DLZAC2644 | 2018 | 360.8 | 4.77  | 7.20 | 1167.8 | 1.16 | 881.6 | 492.0 | 0.1193   | 316.0 | 31.6 | 15.2 |
|    | DLZAC2644 | 2020 | 362.4 | 4.08  | 7.20 | 856.1  | 1.14 | 721.2 | 451.6 | 0.0732   | 251.2 | 28.4 | 23.6 |
|    | DLZAC2644 | 2021 | 355.8 | 4.42  | 6.90 | 996.7  | 1.11 | 837.6 | 534.5 | 0.1079   | 290.1 | 39.3 | 33.0 |
|    | DLZAC2645 | 2013 | 254.4 | 6.86  | 7.50 | 53.1   | 0.66 | 111.2 |       | <0.01    | 193.1 | 33.8 | 17.3 |
|    | DLZAC2645 | 2013 | 252.5 | 7.31  | 7.30 | 79.2   | 0.71 | 117.5 | 491.0 | <0.01    | 211.9 | 34.7 | 23.9 |
|    | DLZAC2645 | 2014 | 244.4 | 6.94  | 7.61 | 51.6   | 0.66 | 94.3  | 502.7 | <0.01    | 186.3 | 29.9 | 17.8 |
|    | DLZAC2645 | 2015 | 238.5 | 6.83  | 7.50 | 54.2   | 0.67 | 109.1 | 387.4 | <0.01    | 199.5 | 29.7 | 19.0 |
| 40 | DLZAC2645 | 2016 | 246.2 | 6.35  | 7.80 | 54.4   | 0.59 | 170.0 | 477.5 | <0.01    | 252.7 | 45.5 | 23.3 |
|    | DLZAC2645 | 2017 | 135.2 | 7.20  | 8.30 | 80.0   | 0.66 | 133.5 | 567.9 | <0.00139 | 192.9 | 42.3 | 23.3 |
|    | DLZAC2645 | 2018 | 235.8 | 8.43  | 7.50 | 69.9   | 0.70 | 135.7 | 597.9 | <0.00139 | 274.5 | 41.5 | 25.3 |
|    | DLZAC2645 | 2018 | 248.5 | 9.64  | 7.80 | 64.1   | 0.65 | 131.5 | 560.8 | <0.00139 | 270.4 | 36.5 | 17.0 |
|    | DLZAC2645 | 2020 | 227.8 | 10.58 | 7.50 | 75.8   | 0.61 | 151.0 | 633.5 | <0.01    | 299.9 | 39.5 | 22.2 |
|    | DLZAC2646 | 2012 | 177.5 | 2.30  | 7.85 | 19.4   | 1.27 | 54.4  | 29.0  | <0.01    | 43.8  | 3.9  | 33.9 |
|    | DLZAC2646 | 2013 | 171.1 | 1.91  | 7.76 | 19.1   | 1.21 | 51.1  | 36.8  | <0.01    | 39.9  | <1   | 36.3 |
|    | DLZAC2646 | 2014 | 171.2 | 2.18  | 8.30 | 20.3   | 1.40 | 50.3  | 38.6  | <0.01    | 44.2  | 4.6  | 31.8 |
|    | DLZAC2646 | 2015 | 166.5 | 2.22  | 7.90 | 20.8   | 1.41 | 45.4  | 38.9  | <0.01    | 44.6  | 3.8  | 28.7 |
|    | DLZAC2646 | 2016 | 178.8 | 2.53  | 7.80 | 17.7   | 1.41 | 48.8  | 41.3  | <0.01    | 43.4  | 4.0  | 28.4 |
| I  | DLZAC2646 | 2017 | 170.6 | 2.35  | 8.30 | 23.4   | 1.30 | 63.5  | 44.3  | 0.0206   | 51.1  | 5.1  | 31.0 |
|    | DLZAC2646 | 2018 | 157.9 | 2.05  | 8.00 | 21.4   | 1.63 | 57.4  | 37.9  | 0.0157   | 46.9  | 4.8  | 32.3 |

| N  | Well code   | Year | Alk   | NO3-N | pH   | Cl   | F    | Na    | SO4   | As       | Ca    | Mg   | T °C |
|----|-------------|------|-------|-------|------|------|------|-------|-------|----------|-------|------|------|
|    | DLZAC2646   | 2018 | 186.9 | 2.43  | 7.90 | 22.8 | 1.39 | 62.6  | 38.2  | 0.0229   | 54.9  | 5.4  | 24.4 |
|    | DLZAC2646   | 2019 | 180.1 | 2.57  | 8.00 | 18.8 | 1.38 | 53.9  | 36.7  | 0.0190   | 48.2  | 5.0  | 33.3 |
|    | DLZAC2646   | 2020 | 177.6 | 2.64  | 8.20 | 19.2 | 1.41 | 43.7  | 39.4  | 0.0151   | 40.4  | 4.2  | 31.0 |
|    | DLZAC2646   | 2021 | 97.8  | 0.24  | 8.40 |      | 1.75 |       |       |          |       |      | 32.0 |
| 41 | DLZAC2647   | 2012 | 155.6 | 2.09  | 7.90 | 14.7 | 1.47 | 56.3  | 41.0  | <0.01    | 36.6  | <1   | 31.0 |
| I  | DLZAC2647   | 2013 | 152.2 | 1.87  | 7.42 | 15.3 | 1.34 | 54.3  | 38.3  | <0.01    | 34.4  | <1   | 31.9 |
|    | DLZAC2647   | 2014 | 151.5 | 1.94  | 7.76 | 15.3 | 1.53 | 47.3  | 47.7  | <0.01    | 33.5  | <1   | 27.9 |
|    | DLZAC2647   | 2015 | 147.1 | 1.66  | 7.90 | 16.8 | 1.29 | 57.1  | 39.6  | <0.01    | 39.8  | 1.0  | 27.9 |
|    | DLZAC2647   | 2016 | 162.4 | 2.19  | 8.00 | 14.1 | 1.37 | 51.6  | 41.2  | <0.01    | 35.7  | <1   | 27.5 |
|    | DLZAC2647   | 2017 | 165.4 | 1.82  | 8.20 | 24.3 | 1.34 | 40.2  | 36.8  | <0.00139 | 30.9  | 0.5  | 29.0 |
|    | DLZAC2647   | 2018 | 173.2 | 2.32  | 7.90 | 20.9 | 1.60 | 63.0  | 40.6  | <0.00139 | 40.3  | 0.7  | 27.7 |
|    | DLZAC2647   | 2018 | 162.6 | 2.09  | 7.90 | 17.5 | 1.37 | 67.4  | 39.0  | 0.0134   | 47.6  | 0.8  | 26.0 |
|    | DLZAC2647   | 2019 | 162.3 | 2.40  | 7.60 | 16.4 | 1.37 | 57.6  | 32.9  | <0.00139 | 41.7  | 0.7  | 29.6 |
|    | DLZAC2647   | 2020 | 155.4 | 2.16  | 7.80 | 16.3 | 1.36 | 45.9  | 36.6  | 0.01015  | 33.9  | <1   | 29.5 |
| 42 | DLZAC2648   | 2012 | 155.6 | 2.32  | 7.68 | 13.4 | 2.41 | 52.6  | 46.4  | <0.01    | 33.3  | 1.8  | 26.7 |
| I  | DLZAC2648   | 2013 | 145.3 | 2.44  | 7.34 | 14.4 | 1.98 | 54.8  | 38.4  | <0.01    | 34.6  | <1   | 29.9 |
|    | DLZAC2648   | 2014 | 146.4 | 2.10  | 8.00 | 14.4 | 2.48 | 45.3  | 47.6  | 0.0133   | 31.5  | 1.7  | 27.0 |
|    | DLZAC2648   | 2015 | 146.1 | 1.97  | 8.00 | 14.8 | 2.19 | 55.8  | 41.9  | <0.01    | 38.9  | 2.3  | 25.1 |
|    | DLZAC2648   | 2016 | 150.8 | 1.71  | 7.80 | 14.1 | 2.31 | 54.2  | 39.6  | 0.0124   | 38.6  | 2.0  | 25.7 |
|    | DLZAC2648   | 2017 | 166.4 | 2.13  | 8.30 | 38.4 | 2.05 | 51.5  | 39.1  | 0.0125   | 35.5  | 2.0  | 24.9 |
|    | DLZAC2648   | 2018 | 154.8 | 2.06  | 7.80 | 13.8 | 2.31 | 50.1  | 42.4  | 0.0130   | 31.6  | 1.8  | 28.3 |
|    | DLZAC2648   | 2018 | 152.5 | 2.08  | 7.90 | 18.5 | 2.63 | 64.1  | 39.8  | 0.0234   | 42.5  | 2.5  | 26.3 |
|    | DLZAC2648   | 2019 | 152.9 | 2.43  | 7.90 | 14.0 | 2.17 | 56.9  | 42.0  | <0.00139 | 40.2  | 2.5  | 25.1 |
|    | DLZAC2648   | 2020 | 149.9 | 2.24  | 7.80 | 13.8 | 2.14 | 43.3  | 40.2  | 0.01245  | 31.2  | 2.0  | 26.5 |
|    | DLZAC2648   | 2021 | 116.5 | 0.19  | 8.60 |      | 2.94 |       |       |          |       |      | 28.0 |
| 43 | DLZAC2649M1 | 2013 | 172.0 | 3.00  | 7.85 | <10  | 2.19 | 47.3  | <15   | <0.01    | 37.6  | 5.4  | 24.7 |
| II | DLZAC2649M1 | 2013 | 172.1 | 3.62  | 8.88 | <10  | 1.16 | 38.5  | <15   | 0.0414   | 42.5  | 5.3  | 25.5 |
|    | DLZAC2649M1 | 2014 | 163.3 | 3.89  | 8.60 | <10  | 1.18 | 38.1  | 15.2  | <0.01    | 41.6  | 5.7  | 23.2 |
|    | DLZAC2649M1 | 2015 | 168.8 | 3.79  | 7.50 | <10  | 1.17 | 35.6  | <15   | 0.0123   | 40.7  | 4.6  | 26.0 |
|    | DLZAC2649M1 | 2016 | 181.7 | 3.61  | 7.80 | <10  | 1.24 | 33.3  | <15   | <0.01    | 38.6  | 4.7  | 23.6 |
|    | DLZAC2649M1 | 2017 | 176.0 | 3.64  | 7.90 | <10  | 1.22 | 38.8  | 15.1  | 0.1082   | 38.0  | 4.5  | 23.1 |
|    | DLZAC2649M1 | 2018 | 172.2 | 1.87  | 7.60 | <10  | 1.26 | 44.5  | 16.8  | 0.0168   | 46.2  | 6.2  | 27.0 |
|    | DLZAC2649M1 | 2018 | 166.8 | 4.52  | 8.10 | <10  | 1.20 | 42.1  | 15.4  | 0.0182   | 41.9  | 5.8  | 23.5 |
|    | DLZAC2649M1 | 2020 | 225.3 | 3.93  | 7.70 | <10  | 1.42 | 49.1  | <15   | 0.0113   | 47.9  | 6.7  | 22.9 |
| 44 | DLZAC2650   | 2012 | 222.5 | 2.85  | 8.11 | 24.4 | 2.57 | 90.8  | 61.9  | <0.01    | 44.5  | 3.1  | 27.3 |
| I  | DLZAC2650   | 2013 | 213.9 | 2.91  | 7.66 | 23.9 | 2.44 | 92.3  | 75.4  | 0.0239   | 46.7  | 4.2  | 28.6 |
|    | DLZAC2650   | 2014 | 207.1 | 3.12  | 7.53 | 25.5 | 2.42 | 89.9  | 63.2  | 0.0208   | 48.5  | 3.7  | 26.9 |
|    | DLZAC2650   | 2015 | 204.4 | 2.36  | 7.90 | 25.4 | 2.34 | 90.2  | 63.6  | 0.0267   | 47.8  | 3.5  | 25.3 |
|    | DLZAC2650   | 2016 | 214.8 | 2.16  | 7.80 | 26.9 | 2.75 | 107.5 | 61.2  | 0.0217   | 47.6  | 3.3  | 27.4 |
|    | DLZAC2650   | 2017 | 225.7 | 2.29  | 7.90 | 29.0 | 2.44 | 84.8  | 65.3  | 0.0224   | 42.5  | 3.1  | 27.5 |
|    | DLZAC2650   | 2018 | 215.3 | 2.85  | 7.60 | 26.0 | 2.76 | 94.6  | 67.8  | 0.0297   | 42.8  | 3.3  | 29.7 |
|    | DLZAC2650   | 2018 | 220.2 | 2.83  | 7.80 | 28.2 | 2.81 | 110.5 | 56.5  | 0.0323   | 52.5  | 4.4  | 25.3 |
|    | DLZAC2650   | 2019 | 206.2 | 3.01  | 7.40 | 27.0 | 2.60 | 90.1  | 76.7  | 0.0296   | 47.0  | 3.7  | 25.5 |
|    | DLZAC2650   | 2020 | 216.5 | 2.76  | 8.10 | 22.7 | 2.47 | 73.5  | 70.2  | 0.0226   | 38.8  | 3.0  | 25.5 |
|    | DLZAC2650   | 2021 | 130.0 | 0.49  | 8.60 |      | 2.74 |       |       |          |       |      | 19.0 |
| 45 | DLZAC2651   | 2012 | 394.5 | 4.83  | 7.02 | 59.0 | 1.81 | 101.0 | 168.2 | <0.01    | 93.6  | 30.7 | 25.6 |
| I  | DLZAC2651   | 2013 | 373.1 | 4.42  | 6.83 | 59.3 | 2.24 | 135.0 | 264.5 | <0.01    | 126.8 | 35.8 | 26.4 |
|    | DLZAC2651   | 2014 | 378.8 | 3.83  | 6.70 | 55.3 | 2.39 | 129.3 | 294.8 | 0.0265   | 128.2 | 33.1 | 23.2 |
|    | DLZAC2651   | 2015 | 357.2 | 3.86  | 7.00 | 60.3 | 2.13 | 149.8 | 287.1 | 0.0361   | 157.6 | 42.0 | 22.9 |
|    | DLZAC2651   | 2016 | 372.2 | 3.58  | 7.00 | 61.3 | 2.43 | 178.0 | 287.0 | 0.0270   | 195.8 | 36.6 | 25.3 |
|    | DLZAC2651   | 2017 | 397.3 | 3.95  | 7.20 | 66.0 | 2.16 | 138.0 | 273.8 | 0.0223   | 139.5 | 34.1 | 24.5 |
|    | DLZAC2651   | 2018 | 382.3 | 4.65  | 7.00 | 69.4 | 2.27 | 146.8 | 204.3 | 0.0331   | 140.1 | 35.0 | 25.8 |

| N  | Well code   | Year | Alk   | NO3-N | pH   | Cl    | F     | Na    | SO4   | As       | Ca    | Mg   | T °C |
|----|-------------|------|-------|-------|------|-------|-------|-------|-------|----------|-------|------|------|
|    | DLZAC2651   | 2018 | 391.9 | 4.64  | 7.10 | 65.6  | 2.44  | 145.9 | 232.4 | 0.0359   | 151.3 | 40.4 | 24.7 |
|    | DLZAC2651   | 2019 | 391.1 | 5.02  | 6.90 | 63.2  | 2.38  | 125.1 | 215.7 | 0.0328   | 146.5 | 39.6 | 23.7 |
|    | DLZAC2651   | 2020 | 313.0 | 3.83  | 8.20 | 73.4  | 2.20  | 146.6 | 308.6 | 0.0252   | 85.4  | 35.0 | 24.6 |
|    | DLZAC2651   | 2021 | 132.6 | 0.46  | 8.30 |       | 2.64  |       |       |          |       |      | 26.0 |
| 46 | DLZAC2652M1 | 2013 | 208.0 | 1.99  | 7.37 | 10.8  | 0.53  | 50.0  | 32.5  | <0.01    | 26.8  | 26.0 | 18.9 |
| I  | DLZAC2652M1 | 2013 | 205.0 | 1.90  | 7.99 | 11.0  | 0.59  | 43.5  | 45.6  | <0.01    | 25.9  | 23.5 | 25.6 |
|    | DLZAC2652M1 | 2014 | 201.0 | 1.87  | 7.84 | 11.5  | 0.58  | 46.9  | 41.4  | <0.01    | 31.0  | 27.1 | 26.3 |
|    | DLZAC2652M1 | 2015 | 202.5 | 1.95  | 7.80 | 11.2  | 0.61  | 40.5  | 44.0  | <0.01    | 27.3  | 24.1 | 23.2 |
|    | DLZAC2652M1 | 2016 | 211.5 | <0.02 |      | <10   | 0.52  | 42.0  | 36.4  | <0.01    | 26.6  | 22.2 | 20.2 |
|    | DLZAC2652M1 | 2017 | 219.4 | 2.03  | 8.10 | 17.8  | 0.54  | 45.9  | 35.9  | <0.00139 | 29.5  | 25.0 | 25.5 |
|    | DLZAC2652M1 | 2018 | 215.3 | 1.94  | 8.10 | 14.3  | 0.58  | 42.4  | 43.0  | <0.00139 | 27.3  | 22.7 | 29.4 |
|    | DLZAC2652M1 | 2018 | 223.5 | 1.55  | 8.00 | 12.3  | 0.57  | 38.9  | 37.7  | 0.0100   | 24.2  | 20.6 | 23.0 |
|    | DLZAC2652M1 | 2019 | 212.1 | 1.03  | 7.80 | 13.0  | 0.57  | 37.3  | 36.5  | 0.0067   | 27.2  | 33.2 | 28.0 |
|    | DLZAC2652M1 | 2020 | 208.7 | 1.85  | 8.00 | 11.7  | 0.58  | 52.2  | 40.9  | 0.0135   | 30.8  | 24.5 | 27.4 |
|    | DLZAC2652M1 | 2021 | 209.6 | 1.67  | 7.50 | 12.6  | 0.55  | 40.2  | 32.7  | 0.0117   | 32.1  | 29.3 | 28.0 |
| 47 | DLZAC2653   | 2013 | 170.1 | 2.70  | 8.94 | <10   | 1.99  | 43.8  | <15   | 0.0148   | 38.8  | 5.0  | 25.1 |
| II | DLZAC2653   | 2014 | 156.0 | 2.99  | 7.70 | <10   | 1.99  | 42.1  | <15   | 0.0166   | 34.2  | 4.8  | 24.0 |
|    | DLZAC2653   | 2015 | 167.7 | 2.73  | 8.10 | <10   | 1.84  | 50.4  | <15   | 0.0217   | 36.7  | 4.6  | 26.5 |
|    | DLZAC2653   | 2016 | 165.9 | 2.51  | 7.90 | <10   | 2.13  | 36.8  | <15   | 0.0227   | 32.2  | 4.0  | 28.1 |
|    | DLZAC2653   | 2017 | 173.9 | 2.17  | 7.90 | <10   | 2.22  | 43.5  | 13.1  | 0.0984   | 32.7  | 4.1  | 24.3 |
|    | DLZAC2653   | 2018 | 165.0 | 0.85  | 7.70 | <10   | 2.16  | 51.4  | 17.1  | 0.0281   | 41.4  | 5.3  | 31.3 |
|    | DLZAC2653   | 2018 | 164.6 | 2.49  | 8.10 | 10.3  | 2.06  | 46.7  | 17.3  | 0.0270   | 35.7  | 4.9  | 26.0 |
|    | DLZAC2653   | 2020 | 179.8 | 2.78  | 7.90 | <10   | 1.99  | 40.6  | <15   | 0.0224   | 33.4  | 4.5  | 22.4 |
| 48 | DLZAC2654   | 2013 | 301.5 | 0.90  | 8.15 | 77.5  | 2.30  | 284.6 | 592.2 | 0.0468   | 107.2 | 38.2 | 24.8 |
| II | DLZAC2654   | 2014 | 270.4 | 1.32  | 8.20 | 83.9  | 2.27  | 305.8 | 588.0 | <0.01    | 92.9  | 35.3 | 24.5 |
|    | DLZAC2654   | 2015 | 166.8 | 1.37  | 7.30 | 82.5  | 2.19  | 232.6 | 496.5 | 0.0169   | 98.3  | 31.2 | 23.9 |
|    | DLZAC2654   | 2016 | 285.6 | 1.04  | 7.90 | 79.7  | 2.39  | 241.6 | 621.3 | 0.0218   | 89.3  | 30.7 | 23.4 |
|    | DLZAC2654   | 2017 | 286.7 | 1.02  | 7.40 | 80.8  | 1.98  | 269.9 | 442.1 | 0.0198   | 88.6  | 32.4 | 25.4 |
|    | DLZAC2654   | 2018 | 272.7 | 1.02  | 7.10 | 105.7 | 0.67  |       |       | 0.0209   |       | 49.7 | 23.5 |
|    | DLZAC2654   | 2018 | 257.2 | 1.47  | 8.00 | 93.6  | 2.39  | 275.1 | 508.6 | 0.0264   | 95.2  | 38.8 | 25.8 |
|    | DLZAC2654   | 2020 | 293.0 | 1.31  | 7.90 | 82.2  | 2.75  | 238.4 | 573.3 | 0.0137   | 91.9  | 34.9 | 21.2 |
| 49 | DLZAC2655   | 2013 | 345.0 | 1.60  | 7.57 | 96.3  | 5.76  | 366.8 | 412.5 | 0.1960   | 79.4  | 7.7  | 29.6 |
| II | DLZAC2655   | 2013 | 378.8 | 3.24  | 7.28 | 97.6  | 6.31  | 417.8 | 446.8 | 0.2010   | 62.8  | 6.4  | 34.7 |
|    | DLZAC2655   | 2014 | 393.3 | 3.46  | 7.40 | 154.2 | 5.60  | 526.7 | 508.6 | 0.2081   | 55.9  | 5.4  | 31.3 |
|    | DLZAC2655   | 2015 | 383.0 | 3.01  | 7.40 | 105.6 | 8.12  | 414.2 | 660.2 | 0.1556   | 63.0  | 6.5  | 24.9 |
|    | DLZAC2655   | 2016 | 398.9 | 2.88  | 7.20 | 97.6  | 4.90  | 453.4 | 360.7 | 0.1769   | 65.4  | 5.6  | 31.0 |
|    | DLZAC2655   | 2017 | 416.0 | 2.93  | 7.60 | 117.5 | 6.77  | 420.8 | 575.7 | 0.1785   | 62.8  | 6.5  | 28.9 |
|    | DLZAC2655   | 2018 | 393.6 | 1.71  | 7.30 | 108.2 | 6.05  | 589.4 | 582.7 | 0.2217   | 79.3  | 7.6  | 33.1 |
|    | DLZAC2655   | 2018 | 381.5 | 3.65  | 7.40 | 117.3 | 5.74  | 412.2 | 561.3 | 0.2112   | 67.2  | 7.1  | 31.1 |
|    | DLZAC2655   | 2020 | 400.8 | 4.05  | 7.40 | 109.1 | 5.67  | 438.7 | 523.3 | 0.1957   | 62.9  | 6.7  | 30.8 |
| 50 | DLZAC2659   | 2013 | 771.2 | 14.51 | 8.65 | 65.0  | 21.32 |       | 251.4 | 0.0549   |       | 9.5  | 21.3 |
| II | DLZAC2659   | 2013 | 40.4  | 17.43 | 8.34 | 73.8  | 26.87 | 540.9 | 273.0 | 0.3720   | 3.6   | <1   | 23.1 |
|    | DLZAC2659   | 2014 | 76.0  |       | 8.76 | 62.7  | 24.52 | 505.5 | 251.5 | 0.3713   | 3.9   | <1   | 22.6 |
|    | DLZAC2659   | 2015 | 734.9 | 15.40 | 8.90 | 50.9  | 21.96 | 509.4 | 191.3 | 0.4253   | 4.8   | <1   | 17.5 |
|    | DLZAC2659   | 2016 | 720.4 | 17.18 | 8.60 | 59.4  | 29.60 | 664.7 | 311.7 | 0.3728   | 3.4   | <1   | 22.7 |
|    | DLZAC2659   | 2017 | 624.0 | 15.57 | 8.50 | 62.2  | 21.45 | 461.4 | 242.6 | 0.3998   | 4.5   | 0.7  | 26.6 |
|    | DLZAC2659   | 2018 | 791.3 | 19.87 | 8.60 | 71.5  | 21.67 | 632.6 | 246.6 | 0.4691   | 3.1   | 0.6  | 25.4 |
|    | DLZAC2659   | 2018 | 837.1 | 18.20 | 8.70 | 71.9  | 22.29 | 712.6 | 246.1 | 0.5051   | 4.6   | 0.8  | 21.5 |
|    | DLZAC2659   | 2019 | 644.6 | 8.38  | 8.60 | 55.9  | 19.23 | 608.2 | 203.5 | 0.4013   | 3.2   | 0.7  | 23.7 |
|    | DLZAC2659   | 2020 | 681.1 | 18.35 | 8.60 | 54.3  | 21.24 | 545.1 | 225.1 | 0.3784   | 3.5   | <1   | 23.1 |
| 51 | DLZAC2660   | 2013 | 194.5 | 5.82  | 7.90 | 50.1  | 2.82  | 181.3 | 182.4 | <0.01    | 65.2  | 5.8  | 23.0 |
| II | DLZAC2660   | 2014 | 212.0 | 6.16  | 7.90 | 70.5  | 3.72  | 161.1 | 267.8 | <0.01    | 61.6  | 4.7  | 23.1 |

| N  | Well code   | Year | Alk   | NO3-N | pH   | Cl    | F    | Na    | SO4     | As       | Ca   | Mg   | T °C |
|----|-------------|------|-------|-------|------|-------|------|-------|---------|----------|------|------|------|
|    | DLZAC2660   | 2015 | 202.5 | 5.61  | 8.20 | 57.5  | 3.05 | 184.0 | 225.2   | 0.0110   | 70.6 | 5.7  | 21.4 |
|    | DLZAC2660   | 2016 | 124.8 | 2.56  | 8.90 | 136.3 | 3.35 | 247.7 | 296.2   | 0.0132   |      | 4.6  | 26.5 |
|    | DLZAC2660   | 2017 | 202.8 | 6.25  | 7.70 | 62.2  | 2.93 | 157.2 | 221.0   | 0.0131   | 73.9 | 5.8  | 26.0 |
|    | DLZAC2660   | 2018 | 207.1 | 7.04  | 7.80 | 59.7  | 3.27 | 182.0 | 408.1   | 0.0185   | 63.0 | 5.6  | 25.7 |
|    | DLZAC2660   | 2018 | 218.0 | 5.87  | 7.90 | 58.1  | 3.18 | 188.8 | 230.3   | 0.0167   | 76.8 | 6.1  | 23.8 |
|    | DLZAC2660   | 2019 | 203.8 | 3.27  | 7.40 | 58.3  | 2.92 | 143.9 | 248.8   | <0.00139 | 52.3 | 5.9  | 25.0 |
|    | DLZAC2660   | 2020 | 203.7 | 6.58  | 7.80 | 58.2  | 2.94 | 183.5 | 224.1   | 0.0111   | 63.5 | 5.0  | 26.6 |
| 52 | DLZAC2661   | 2012 | 289.4 | 4.94  | 7.76 | 25.9  | 2.92 | 115.0 | 156.9   | <0.01    | 35.8 | 6.5  | 25.9 |
| II | DLZAC2661   | 2013 | 278.6 | 4.62  | 7.44 | 24.9  | 2.73 | 147.5 | 186.8   | <0.01    | 37.6 | 7.3  | 24.5 |
|    | DLZAC2661   | 2014 | 280.9 | 4.54  | 8.00 | 23.0  | 2.91 |       | 139.0   | 0.0323   |      |      | 24.7 |
|    | DLZAC2661   | 2015 | 266.4 | 4.82  | 7.80 | 26.4  | 3.33 | 240.0 | 166.8   | <0.01    | 40.8 | 7.3  | 24.7 |
|    | DLZAC2661   | 2016 | 286.2 | 3.64  | 7.80 | 24.0  | 2.80 | 196.3 | 142.2   | <0.01    | 53.0 | 9.3  | 25.7 |
|    | DLZAC2661   | 2017 | 279.8 | 4.87  | 7.60 | 27.6  | 2.66 | 142.7 | 125.7   | 0.0172   | 47.5 | 8.3  | 26.0 |
|    | DLZAC2661   | 2018 | 271.6 | 4.58  | 7.50 | 30.6  | 2.94 | 183.2 | 138.4   | 0.0202   | 45.5 | 8.4  | 27.3 |
|    | DLZAC2661   | 2018 | 262.7 | 4.73  | 8.10 | 30.1  | 2.99 | 172.9 | 154.0   | 0.0204   | 49.4 | 8.6  | 23.2 |
|    | DLZAC2661   | 2020 | 274.2 | 5.71  | 7.50 | 25.9  | 2.76 | 168.8 | 107.5   | 0.0181   | 39.9 | 7.1  | 22.7 |
|    | DLZAC2661   | 2021 | 293.5 | 3.77  | 7.90 | 30.7  | 2.79 | 157.7 | 122.0   | 0.0238   | 52.5 | 9.4  | 24.0 |
| 53 | DLZAC2662   | 2012 | 248.4 | 5.53  | 8.12 | 18.9  | 4.32 | 78.2  | 214.4   | <0.01    | 34.8 | 5.1  | 24.2 |
| I  | DLZAC2662   | 2013 | 218.4 | 6.49  | 7.85 | 30.2  | 3.43 | 114.0 | 73.3    | 0.0339   | 39.8 | 5.4  | 25.3 |
|    | DLZAC2662   | 2014 | 232.2 | 6.95  | 7.97 | 19.6  | 3.05 | 106.4 | 70.3    | 0.0213   | 47.8 | 6.4  | 19.6 |
|    | DLZAC2662   | 2015 | 234.3 | 6.64  | 7.90 | 17.8  | 3.44 | 101.1 | 80.4    | 0.0254   | 46.3 | 6.3  | 21.1 |
|    | DLZAC2662   | 2016 | 264.6 | 5.27  | 8.10 | 45.2  | 3.39 | 136.6 | 73.9    | 0.0307   | 56.9 | 7.8  | 23.8 |
|    | DLZAC2662   | 2017 | 243.4 | 6.56  | 7.60 | 25.7  | 2.97 | 101.9 | 83.4    | 0.0319   | 51.0 | 7.3  | 24.0 |
|    | DLZAC2662   | 2018 | 240.9 | 8.23  | 7.90 | 35.7  | 3.58 | 129.6 | 77.1    | 0.0332   | 48.7 | 7.2  | 24.2 |
|    | DLZAC2662   | 2018 | 259.6 | 7.80  | 7.70 | 27.7  | 3.00 | 131.0 | 69.1    | 0.0331   | 58.9 | 7.7  | 22.0 |
|    | DLZAC2662   | 2020 | 247.5 | 8.88  | 8.10 | 34.5  | 3.30 | 133.5 | 82.1    | 0.0236   | 47.9 | 6.5  | 23.6 |
| 54 | DLZAC2663   | 2012 | 167.7 | 0.86  | 7.61 | <10   | <0.2 | 30.7  | 26.7    | 0.0199   | 38.9 | 4.3  | 25.9 |
| I  | DLZAC2663   | 2013 | 160.1 | 1.14  | 7.45 | <10   | 0.95 | 38.9  | 31.3    | <0.01    | 43.9 | 4.5  | 27.0 |
|    | DLZAC2663   | 2014 | 170.6 | 1.25  | 7.88 | <10   | 1.16 | 40.0  | 37.7    | 0.0146   | 49.4 | 5.6  | 24.0 |
|    | DLZAC2663   | 2015 | 181.3 | 1.18  | 7.40 | <10   | 1.24 | 32.6  | 19.2    | 0.0136   | 45.5 | 5.4  | 25.4 |
|    | DLZAC2663   | 2016 | 186.8 | 0.92  | 7.90 | <10   | 1.22 | 42.8  | 30.1    | <0.01    | 61.4 | 6.3  | 24.8 |
|    | DLZAC2663   | 2017 | 197.6 | 1.34  | 7.50 | 16.4  | 1.27 | 36.4  | 36.6    | 0.0228   | 55.9 | 6.5  | 27.7 |
|    | DLZAC2663   | 2018 | 182.5 | 1.32  | 7.40 | 12.8  | 1.31 | 41.5  | 35.2    | 0.0222   | 51.6 | 5.8  | 28.8 |
|    | DLZAC2663   | 2018 | 190.9 | 1.46  | 7.40 | 14.6  | 1.25 | 43.8  | 30.7    | 0.0201   | 58.8 | 6.2  | 24.9 |
|    | DLZAC2663   | 2020 | 186.5 | 1.02  | 7.60 | <10   | 1.22 | 32.2  | 31.0    | 0.0169   | 45.6 | 5.4  | 26.1 |
|    | DLZAC2663   | 2021 | 189.2 | 1.31  |      |       | 1.36 |       |         | 0.0210   |      |      |      |
| 55 | DLZAC2664M1 | 2013 | 200.0 | 1.43  | 7.53 |       | 0.65 | 50.0  | 32.5    | <0.01    | 31.2 | 36.0 | 22.5 |
| I  | DLZAC2664M1 | 2013 | 198.0 | 1.61  | 7.88 | <10   | 0.63 | 38.5  | 30.6    | <0.01    | 21.2 | 24.2 | 28.3 |
|    | DLZAC2664M1 | 2014 | 192.9 | 1.69  | 7.61 | 10.2  | 0.72 | 32.3  | 26.6    | <0.01    | 20.9 | 24.7 | 16.4 |
|    | DLZAC2664M1 | 2015 | 196.7 | 1.44  | 7.90 | 10.1  | 0.61 | 48.9  | 28.2    | <0.01    | 29.3 | 32.1 | 21.8 |
|    | DLZAC2664M1 | 2016 | 195.4 | 1.16  | 8.10 | <10   | 0.63 | 28.1  | 30.2    | <0.01    | 16.7 | 18.1 | 25.6 |
|    | DLZAC2664M1 | 2017 | 202.8 | 0.98  | 8.30 | 11.7  | 0.62 | 44.4  | 22.5    | 0.0101   | 26.9 | 28.2 | 23.9 |
|    | DLZAC2664M1 | 2018 | 210.4 | 1.27  | 7.80 | <10   | 0.67 | 32.6  | 25.7    | <0.00139 | 19.6 | 21.1 | 22.3 |
|    | DLZAC2664M1 | 2019 | 194.3 | 1.51  | 7.90 | <10   | 0.69 | 46.6  | 25.6    | <0.01    | 18.8 | 26.6 | 26.4 |
|    | DLZAC2664M1 | 2020 | 202.0 | 1.57  | 8.10 | <10   | 0.64 | 45.5  | 25.5    | <0.01    | 26.1 | 25.0 | 25.9 |
|    | DLZAC2664M1 | 2021 | 129.0 | 0.17  |      |       | 0.69 |       |         |          |      |      |      |
| 56 | DLZAC2665   | 2012 | 67.8  | 2.07  | 7.87 | <10   | <0.2 | <10   |         | <0.01    | 14.5 | 2.8  | 22.1 |
| I  | DLZAC2665   | 2013 | 63.6  | 1.83  | 7.55 | <10   | 0.30 | <10   | <15     | <0.01    | 16.1 | 3.0  | 23.3 |
|    | DLZAC2665   | 2014 | 63.7  | 2.39  | 7.33 | <10   | 0.33 | <10   | <15     | <0.01    | 19.2 | 3.4  | 22.5 |
|    | DLZAC2665   | 2015 | 67.8  | 2.05  | 7.70 | <10   | 0.37 | <10   | <15     | <0.01    | 17.4 | 3.2  | 24.1 |
|    | DLZAC2665   | 2016 | 78.8  | 1.68  | 8.10 | <10   | 0.30 | <10   | <15     | <0.01    | 21.6 | 3.9  | 21.7 |
|    | DLZAC2665   | 2017 | 72.8  | 2.58  | 7.60 | <10   | 0.30 | 8.1   | <0.8188 | <0.00139 | 20.3 | 3.7  | 23.5 |

| N  | Well code   | Year | Alk   | NO3-N | pH   | Cl   | F    | Na   | SO4  | As       | Ca   | Mg   | T °C |
|----|-------------|------|-------|-------|------|------|------|------|------|----------|------|------|------|
|    | DLZAC2665   | 2018 | 75.9  | 1.93  | 7.50 | <10  | 0.32 | 9.2  | 5.0  | <0.00139 | 18.7 | 3.7  | 23.3 |
|    | DLZAC2665   | 2018 | 73.7  | 2.59  | 7.30 | <10  | 0.30 | 10.4 | 2.8  | <0.00139 | 22.8 | 4.1  | 21.9 |
|    | DLZAC2665   | 2020 | 73.3  | 2.08  | 7.30 | <10  | 0.31 | <10  | <15  | <0.01    | 18.0 | 3.7  | 20.5 |
|    | DLZAC2665   | 2021 | 55.3  | 0.29  | 7.47 |      | 1.09 |      |      |          |      |      | 23.0 |
| 57 | DLZAC2666   | 2013 | 138.9 | 1.72  | 7.60 | <10  | 0.23 | 14.7 | <15  | <0.01    | 28.1 | 10.8 | 33.6 |
| I  | DLZAC2666   | 2014 | 144.7 | 2.02  | 7.77 | <10  | 0.27 | 15.3 | <15  | <0.01    | 31.4 | 12.9 | 23.5 |
|    | DLZAC2666   | 2015 | 152.1 | 1.89  | 7.90 | <10  | 0.25 | 15.0 | <15  | <0.01    | 29.9 | 11.5 | 22.8 |
|    | DLZAC2666   | 2016 | 151.2 | 1.35  | 8.00 | <10  | 0.21 | 17.7 | <15  | <0.01    | 36.7 | 14.7 | 23.1 |
|    | DLZAC2666   | 2017 | 151.8 | 1.82  | 7.80 | <10  | 0.21 | 13.3 | <15  | <0.00139 | 31.8 | 13.7 | 22.9 |
|    | DLZAC2666   | 2018 | 150.5 | 4.02  | 7.50 | <10  | 0.22 | 19.7 | 2.5  | <0.00139 | 35.1 | 16.0 | 21.9 |
|    | DLZAC2666   | 2012 | 144.6 | 1.71  | 8.51 | <10  | <0.2 | 17.9 | <15  | <0.01    | 36.6 | 15.2 | 17.7 |
|    | DLZAC2666   | 2020 | 154.3 | 1.93  | 7.90 | <10  | 0.21 | 13.5 | <15  | <0.01    | 29.2 | 14.4 | 20.9 |
|    | DLZAC2666   | 2021 | 76.5  | 0.25  | 8.21 |      | 2.09 |      |      |          |      |      | 24.0 |
| 58 | DLZAC2667   | 2012 | 172.0 | 1.39  | 7.85 | <10  | 0.57 | 17.1 | <15  | <0.01    | 39.3 | 2.4  | 23.4 |
| I  | DLZAC2667   | 2013 | 153.2 | 1.11  | 7.85 | <10  | 1.03 | 27.2 | <15  | <0.01    | 43.1 | 2.5  | 25.1 |
|    | DLZAC2667   | 2014 | 157.7 | 1.74  | 7.51 | <10  | 0.88 | 21.1 | <15  | <0.01    | 53.5 | 3.0  | 16.5 |
|    | DLZAC2667   | 2015 | 153.5 | 1.08  | 7.30 | <10  | 1.05 | 26.1 | <15  | <0.01    | 45.9 | 1.4  | 22.7 |
|    | DLZAC2667   | 2016 | 158.4 | 0.73  | 7.70 | <10  | 1.12 | 24.1 | <15  | <0.01    | 36.3 | 2.0  | 25.3 |
|    | DLZAC2667   | 2017 | 159.1 | 1.30  | 7.20 | <10  | 0.98 | 25.8 | 6.9  | <0.00139 | 46.8 | 2.4  | 23.3 |
|    | DLZAC2667   | 2018 | 168.3 | 1.11  | 8.25 | <10  | 0.98 | 24.3 | 3.6  | 0.0070   | 42.9 | 2.2  | 24.0 |
|    | DLZAC2667   | 2018 | 170.0 | 0.70  | 7.90 | <10  | 1.08 | 27.4 | 14.2 | <0.00139 | 46.7 | 2.4  | 23.6 |
|    | DLZAC2667   | 2020 | 158.7 | 1.39  | 7.70 | <10  | 1.03 | 27.1 | <15  | <0.01    | 47.5 | 2.3  | 27.2 |
|    | DLZAC2667   | 2021 | 91.8  | 0.17  | 8.00 |      | 1.13 |      |      |          |      |      | 25.0 |
| 59 | DLZAC2668   | 2012 | 136.5 | 1.02  | 8.00 | <10  | 4.70 | 31.7 | <15  | <0.01    | 22.4 | <1   | 28.2 |
| I  | DLZAC2668   | 2013 | 126.4 | 1.01  | 7.92 | <10  | 4.32 | 41.6 | <15  | <0.01    | 24.1 | <1   | 29.9 |
|    | DLZAC2668   | 2014 | 131.2 | 0.95  | 8.30 | <10  | 4.46 | 44.5 | <15  | 0.0143   | 26.1 | <1   | 29.1 |
|    | DLZAC2668   | 2015 | 123.0 | 1.06  | 8.20 | <10  | 4.47 | 41.8 | <15  | <0.01    | 24.2 | <1   | 28.0 |
|    | DLZAC2668   | 2016 | 138.9 | 0.62  | 7.90 | <10  | 3.98 | 41.3 | <15  | 0.0171   | 21.7 | <1   | 27.0 |
|    | DLZAC2668   | 2017 | 196.6 | 1.07  | 7.80 | <10  | 4.32 | 41.1 | 9.8  | 0.018    | 25.6 | 0.5  | 30.6 |
|    | DLZAC2668   | 2018 | 131.2 | 0.96  | 8.10 | <10  | 4.48 | 42.2 | 11.4 | <0.00139 | 23.0 | 0.4  | 28.5 |
|    | DLZAC2668   | 2018 | 141.7 | 0.50  | 8.20 | <10  | 4.29 | 46.4 | 13.6 | 0.0120   | 27.8 | 0.5  | 28.1 |
|    | DLZAC2668   | 2020 | 134.3 | 1.08  | 8.20 | <10  | 4.45 | 45.6 | <15  | 0.0118   | 28.4 | <1   | 28.5 |
|    | DLZAC2668   | 2021 |       | 0.15  | 8.10 |      | 4.90 |      |      |          |      |      | 29.0 |
| 60 | DLZAC2669   | 2013 | 124.0 | 0.73  | 7.84 | <10  | 3.35 |      | <15  | <0.01    |      |      | 30.6 |
| I  | DLZAC2669   | 2014 | 121.0 | 0.69  | 8.20 | <10  | 4.02 | 29.5 | <15  | 0.0117   | 32.4 | <1   | 28.2 |
|    | DLZAC2669   | 2015 | 115.6 | 1.05  | 7.70 | <10  | 3.91 | 25.7 | <15  | <0.01    | 29.6 | <1   | 28.8 |
|    | DLZAC2669   | 2016 | 134.4 | 0.48  | 7.70 | <10  | 3.71 | 26.2 | <15  | <0.01    | 28.6 | <1   | 21.8 |
|    | DLZAC2669   | 2017 | 121.7 | 0.73  | 7.80 | <10  | 3.84 | 26.2 | 8.1  | 0.0116   | 34.0 | 0.7  | 27.1 |
|    | DLZAC2669   | 2018 | 127.1 | 0.67  | 8.00 | <10  | 4.04 | 30.7 | 8.6  | 0.0129   | 33.5 | 0.6  | 30.2 |
|    | DLZAC2669   | 2018 | 135.2 | 0.02  | 8.20 | <10  | 3.89 | 30.8 | 13.1 | 0.0079   | 35.7 | 0.6  | 28.3 |
|    | DLZAC2669   | 2020 | 123.2 | 0.74  | 8.00 | <10  | 3.91 | 32.6 | <15  | <0.01    | 37.0 | <1   | 28.2 |
|    | DLZAC2669   | 2021 | 93.0  | 0.11  | 7.80 |      | 3.96 |      |      |          |      |      | 32.0 |
| 61 | DLZAC2671M1 | 2013 | 264.6 | 2.14  | 7.86 | 13.9 | 2.18 | 81.5 | 40.7 | <0.01    | 49.3 | 22.6 | 21.0 |
| I  | DLZAC2671M1 | 2014 | 251.5 | 2.11  | 7.80 | 13.6 | 1.93 | 65.3 | 38.5 | 0.0267   | 31.8 | 15.7 | 26.3 |
|    | DLZAC2671M1 | 2015 | 234.3 | 2.71  | 8.10 | 14.0 | 1.55 | 53.1 | 21.1 | <0.01    | 41.6 | 15.6 | 28.1 |
|    | DLZAC2671M1 | 2016 | 256.3 | 2.04  | 7.80 | 15.2 | 1.84 | 85.7 | 33.9 | 0.0141   | 35.6 | 19.4 | 27.1 |
|    | DLZAC2671M1 | 2016 | 264.6 | 1.39  | 7.80 | 15.2 | 1.73 | 43.5 | 36.2 | <0.01    | 25.5 | 14.1 | 28.1 |
|    | DLZAC2671M1 | 2017 | 255.8 | 1.65  | 7.70 | 17.8 | 1.68 | 78.2 | 38.0 | 0.0223   | 42.0 | 22.6 | 27.2 |
|    | DLZAC2671M1 | 2018 | 238.7 | 2.83  | 7.89 | 42.6 | 2.45 | 75.2 | 24.9 | 0.0167   | 40.9 | 20.1 | 24.5 |
|    | DLZAC2671M1 | 2018 | 266.6 | 1.96  | 7.70 | 13.5 | 1.64 | 67.2 | 35.1 | <0.00139 | 27.0 | 20.2 | 26.0 |
|    | DLZAC2671M1 | 2020 | 266.4 | 2.12  | 7.70 | 14.8 | 1.59 | 59.5 | 35.4 | 0.0147   | 35.0 | 18.9 | 26.5 |

| N  | Well code | Year | Alk   | NO3-N | pH   | Cl    | F    | Na     | SO4    | As       | Ca    | Mg    | T °C |
|----|-----------|------|-------|-------|------|-------|------|--------|--------|----------|-------|-------|------|
| 62 | DLZAC2672 | 2012 | 180.2 | <0.02 | 7.90 | <10   | 3.11 | 70.4   | 26.8   | 0.0904   | 16.2  | 1.3   | 26.7 |
| II | DLZAC2672 | 2013 | 175.1 | 2.80  | 8.81 | <10   | 2.74 | 81.1   | 22.0   | 0.1378   | 20.4  | 1.9   | 29.0 |
|    | DLZAC2672 | 2014 | 168.5 | 2.93  | 8.40 | 16.0  | 2.61 | 85.1   | 27.1   | 0.0932   | 16.4  | 1.4   | 27.6 |
|    | DLZAC2672 | 2015 | 270.4 | 2.70  | 7.40 | <10   | 1.37 | 78.0   | 23.3   | 0.0996   | 17.2  | 1.1   | 27.7 |
|    | DLZAC2672 | 2016 | 179.6 | 2.46  | 7.80 | <10   | 2.94 | 66.9   | 23.8   | 0.0968   | 16.2  | 1.2   | 26.5 |
|    | DLZAC2672 | 2017 | 179.6 |       | 7.70 | <10   | 2.46 | 73.0   | 22.4   | 0.0939   | 16.2  | 1.3   | 28.8 |
|    | DLZAC2672 | 2018 | 169.1 | 2.57  | 7.80 | 9.7   | 2.89 | 87.9   | 27.4   | 0.1172   | 17.9  | 1.5   | 29.5 |
|    | DLZAC2672 | 2018 | 163.5 | 2.65  | 8.00 | 13.3  | 2.75 | 82.9   | 30.2   | 0.1110   | 17.6  | 1.5   | 27.9 |
|    | DLZAC2672 | 2020 | 182.0 | 2.88  | 7.90 | <10   | 2.60 | 70.1   | 26.6   | 0.0967   | 16.6  | 1.4   | 27.6 |
| 63 | DLZAC2673 | 2012 | 270.9 | <0.02 | 8.05 | 22.6  | 1.55 | 143.7  | 98.4   | 0.1083   | 24.9  | 2.9   | 25.8 |
| II | DLZAC2673 | 2013 | 266.7 | 4.42  | 8.86 | 24.4  | 1.26 | 145.8  | 108.4  | 0.1246   | 26.7  | 2.9   | 26.8 |
|    | DLZAC2673 | 2014 | 249.6 | 4.86  | 8.40 | 25.5  | 1.20 | 165.0  | 91.0   | 0.0726   | 25.4  | 3.2   | 23.8 |
|    | DLZAC2673 | 2015 | 272.0 | 4.80  | 7.90 | 29.1  | 1.19 | 193.9  | 79.9   | 0.0845   | 28.0  | 3.2   | 25.3 |
|    | DLZAC2673 | 2016 | 270.9 | 4.59  | 7.90 | 22.6  | 1.33 | 126.8  | 95.7   | 0.0967   | 22.7  | 2.6   | 26.0 |
|    | DLZAC2673 | 2017 | 271.1 | 4.62  | 7.70 | 24.6  | 1.25 | 149.4  | 81.6   | 0.0949   | 21.1  | 2.6   | 25.9 |
|    | DLZAC2673 | 2018 | 260.4 | 2.06  | 8.20 | 27.1  | 1.32 | 205.3  | 87.8   | 0.1256   | 28.1  | 3.3   | 27.5 |
|    | DLZAC2673 | 2018 | 256.2 | 4.34  | 8.10 | 30.6  | 1.27 | 146.8  | 92.0   | 0.1144   | 24.5  | 3.2   | 24.1 |
|    | DLZAC2673 | 2020 | 286.4 | 5.31  | 8.00 | 28.4  | 1.33 | 165.5  | 89.1   | 0.1053   | 26.1  | 3.3   | 24.4 |
|    | DLZAC2673 | 2021 | 275.2 | 5.19  | 7.90 | 28.7  | 1.28 | 147.6  | 93.0   | 0.1071   | 31.8  | 4.0   | 23.0 |
| 64 | DLZAC2675 | 2013 | 161.9 | 8.84  | 7.86 | 727.1 | 2.78 |        | 3966.2 | <0.01    |       |       | 25.0 |
| II | DLZAC2675 | 2014 | 106.0 |       | 8.08 | 765.0 | 3.19 | 1615.0 | 3938.3 | <0.01    | 359.8 | 176.0 | 25.2 |
|    | DLZAC2675 | 2015 | 190.8 | 12.08 | 7.90 | 702.5 | 3.01 | 651.2  | 3296.5 | <0.01    | 345.2 | 147.7 | 22.7 |
|    | DLZAC2675 | 2016 | 95.9  | 43.47 | 7.40 | 379.3 | 1.27 | 698.3  | 1363.6 | <0.01    | 457.7 | 51.9  | 23.5 |
|    | DLZAC2675 | 2017 | 104.3 | 44.35 | 8.10 | 580.2 | 1.15 | 641.5  | 1671.9 | <0.00139 | 427.0 | 56.6  | 25.6 |
|    | DLZAC2675 | 2018 | 95.3  | 23.54 | 7.80 | 555.4 | 1.33 | 879.7  | 1740.8 | <0.00139 | 596.0 | 69.9  | 27.6 |
|    | DLZAC2675 | 2018 | 91.6  | 51.54 | 8.10 | 398.1 | 1.38 | 615.4  | 1640.8 | <0.00139 | 355.0 | 64.0  | 28.1 |
|    | DLZAC2675 | 2020 | 93.1  | 58.74 | 8.10 | 403.1 | 1.17 | 640.4  | 1624.5 | <0.01    | 398.4 | 58.4  | 27.6 |
| 65 | DLZAC2676 | 2013 | 189.6 | 11.77 | 7.13 | 27.8  | 0.34 | 10.9   | 53.6   | <0.01    | 135.3 | 7.5   | 19.4 |
| II | DLZAC2676 | 2013 | 191.9 | 15.48 | 7.33 | 34.0  | 0.35 | 10.1   | 56.3   | <0.01    | 109.8 | 6.1   | 22.2 |
|    | DLZAC2676 | 2014 | 216.0 | 20.59 | 7.58 | 34.1  | 0.31 | <10    | 34.8   | <0.01    | 115.2 | 6.2   | 20.0 |
|    | DLZAC2676 | 2015 | 230.0 | 13.27 | 8.00 | 22.2  | 0.24 | <10    | 19.0   | <0.01    | 129.8 | 6.7   | 15.6 |
|    | DLZAC2676 | 2016 | 226.7 | 9.95  | 7.10 | 17.7  | 0.23 | <10    | 40.1   | <0.01    | 121.5 | 6.0   | 21.1 |
|    | DLZAC2676 | 2017 | 156.0 | 12.30 | 8.60 | 29.9  | 0.36 | 15.4   | 80.1   | <0.00139 | 85.5  | 6.8   | 20.2 |
|    | DLZAC2676 | 2018 | 193.7 | 15.78 | 7.50 | 30.6  | 0.27 | 11.1   | 51.5   |          | 143.4 | 7.8   | 23.5 |
|    | DLZAC2676 | 2018 | 239.8 | 7.93  | 7.50 | 33.5  | 0.24 | 9.4    | 48.7   | 0.0114   | 112.9 | 7.8   | 21.4 |
|    | DLZAC2676 | 2020 | 254.0 | 9.16  | 7.50 | 23.5  | 0.24 | 10.2   | 32.5   | <0.01    | 106.2 | 7.0   | 21.6 |
| 66 | DLZAC2677 | 2013 | 184.0 | 1.94  | 7.81 | 10.4  | 0.82 | 29.2   | 24.4   | 0.0692   | 62.4  | 12.5  | 25.6 |
| I  | DLZAC2677 | 2013 | 177.0 | 2.12  | 7.65 | 12.0  | 0.76 | 25.0   | 26.7   | 0.0645   | 48.3  | 9.3   | 27.4 |
|    | DLZAC2677 | 2014 | 178.2 | 1.91  | 7.88 | 11.0  | 0.94 | 25.9   | 30.8   | 0.0652   | 54.6  | 10.4  | 26.2 |
|    | DLZAC2677 | 2015 | 184.4 | 1.39  | 8.00 | <10   | 0.79 | 20.4   | 19.3   | 0.0652   | 49.7  | 11.5  | 26.4 |
|    | DLZAC2677 | 2016 | 187.7 | 1.99  | 7.60 | <10   | 0.82 | 23.0   | 31.9   | 0.0629   | 52.0  | 9.6   | 24.8 |
|    | DLZAC2677 | 2017 | 195.5 | 1.84  | 7.60 | 15.0  | 0.77 | 29.4   | 24.2   | 0.0702   | 56.9  | 10.3  | 28.2 |
|    | DLZAC2677 | 2018 | 194.7 | 1.87  | 7.75 | 15.2  | 0.81 | 29.4   | 26.2   | 0.0874   | 57.0  | 11.3  | 27.4 |
|    | DLZAC2677 | 2018 | 184.8 | 1.96  | 7.20 | 12.6  | 0.83 | 32.3   | 25.7   | 0.0953   | 66.5  | 12.2  | 25.2 |
|    | DLZAC2677 | 2019 | 187.3 | 2.08  | 7.40 | 11.6  | 0.83 | 27.0   | 21.2   | 0.0843   | 68.7  | 12.4  | 25.9 |
|    | DLZAC2677 | 2020 | 184.3 | 1.94  | 7.80 | <10   | 0.88 | 26.9   | 23.9   | 0.0744   | 51.9  | 9.1   | 27.9 |
|    | DLZAC2677 | 2021 | 129.2 | 0.35  | 7.90 |       | 0.68 |        |        |          |       |       | 29.0 |
| 67 | DLZAC2678 | 2013 | 45.3  | 11.57 | 7.96 | 118.1 | 2.60 | 430.1  | 1281.4 | <0.01    | 318.4 | 3.1   | 22.6 |
| II | DLZAC2678 | 2013 | 43.4  | 12.77 | 7.33 | 111.7 | 3.64 | 451.1  | 1234.9 | <0.01    | 263.9 | 2.4   | 25.9 |
|    | DLZAC2678 | 2014 | 79.0  | 14.30 | 7.76 | 131.8 | 2.66 | 370.7  | 1343.4 | 0.0186   | 208.1 | 3.6   | 24.8 |
|    | DLZAC2678 | 2015 | 66.3  | 15.26 | 7.50 | 130.1 | 2.39 |        | 1046.3 | 0.0204   |       | 3.5   | 22.9 |

| N         | Well code   | Year  | Alk   | NO3-N | pH   | Cl    | F     | Na    | SO4    | As       | Ca    | Mg   | T °C |
|-----------|-------------|-------|-------|-------|------|-------|-------|-------|--------|----------|-------|------|------|
| 68        | DLZAC2678   | 2016  | 56.4  | 9.41  | 7.50 | 114.1 | 2.71  | 385.4 | 1617.7 | <0.01    | 283.2 | 2.6  | 23.7 |
|           | DLZAC2678   | 2017  | 55.1  | 12.33 | 7.80 | 120.3 | 2.57  | 438.2 | 1419.8 | 0.0160   | 303.2 | 2.7  | 25.8 |
|           | DLZAC2678   | 2018  | 51.7  | 13.49 | 7.98 | 116.9 | 2.59  | 545.4 | 1189.9 | 0.0172   | 338.2 | 2.8  | 26.1 |
|           | DLZAC2678   | 2018  | 56.7  | 12.89 | 8.20 | 131.6 | 2.45  | 513.0 | 1193.5 | <0.00139 | 331.0 | 3.7  | 24.4 |
|           | DLZAC2678   | 2019  | 39.1  | 8.71  | 8.00 | 125.8 | 2.46  | 518.3 | 1174.2 | 0.0268   | 268.0 | 2.7  | 25.4 |
|           | DLZAC2678   | 2020  | 49.3  | 12.98 | 8.00 | 115.9 | 2.59  | 470.1 | 906.6  | 0.0139   | 291.6 | 2.4  | 23.1 |
|           | DLZAC2679   | 2013  | 184.1 | 4.59  | 7.83 | 43.7  | 2.05  | 171.4 | 211.5  | <0.01    | 59.0  | 5.5  | 16.9 |
|           | DLZAC2679   | 2013  | 183.8 | 5.47  | 7.81 | 44.2  | 2.37  | 168.5 | 238.7  | <0.01    | 55.7  | 4.6  | 24.4 |
|           | DLZAC2679   | 2014  | 180.0 |       | 7.77 | 44.2  | 2.57  | 161.7 | 274.5  | <0.01    | 47.9  | 4.2  | 21.6 |
|           | DLZAC2679   | 2015  | 185.3 | 5.29  | 8.20 | 43.4  | 2.04  | 96.3  | 198.8  | <0.01    | 50.0  | 4.3  | 21.7 |
| 69        | DLZAC2679   | 2016  | 195.3 | 5.43  | 7.80 | 40.6  | 2.18  | 162.2 | 261.7  | <0.01    | 54.3  | 4.5  | 22.1 |
|           | DLZAC2679   | 2017  | 191.4 | 6.32  | 8.00 | 43.5  | 2.11  | 164.1 | 219.3  | 0.0094   | 47.1  | 4.5  | 22.0 |
|           | DLZAC2679   | 2018  | 188.6 | 5.80  | 8.00 | 41.9  | 2.70  | 183.3 | 182.6  | <0.00139 | 38.9  | 3.7  | 28.3 |
|           | DLZAC2679   | 2018  | 199.5 | 5.09  | 8.10 | 40.4  | 2.11  | 192.8 | 203.4  | <0.00139 | 51.3  | 4.6  | 25.1 |
|           | DLZAC2679   | 2019  | 168.3 | 5.67  | 7.50 | 45.3  | 2.04  | 158.1 | 211.3  | <0.00139 | 35.4  | 4.2  | 25.2 |
|           | DLZAC2679   | 2020  | 189.4 | 5.87  | 8.00 | 38.2  | 2.14  | 174.9 | 144.6  | <0.01    | 38.3  | 3.5  | 25.0 |
|           | DLZAC2680M1 | 2012  | 244.4 | <0.02 | 7.78 | 10.8  | 2.64  | 92.0  | 62.1   | <0.01    | 26.9  | 5.7  | 27.1 |
|           | DLZAC2680M1 | 2013  | 229.8 | 2.02  | 8.58 | 12.0  | 1.72  | 91.2  | 65.9   | 0.0405   | 53.8  | 4.1  | 30.0 |
|           | DLZAC2680M1 | 2014  | 199.7 | 2.28  | 8.20 | 12.7  | 1.62  | 78.1  | 64.6   | <0.01    | 48.3  | 3.4  | 27.2 |
|           | DLZAC2680M1 | 2015  | 192.0 | 2.17  | 7.60 | 14.1  | 1.60  | 66.3  | 63.4   | <0.01    | 51.0  | 2.6  | 24.2 |
| 70        | DLZAC2680M1 | 2016  | 172.2 | 1.80  | 7.90 | 12.9  | 1.69  | 46.5  | 66.3   | 0.0125   | 48.4  | 1.8  | 25.5 |
|           | DLZAC2680M1 | 2017  | 225.8 | 2.26  | 7.60 | 12.8  | 1.44  | 75.0  | 52.2   | <0.00139 | 45.1  | 3.2  | 31.7 |
|           | DLZAC2680M1 | 2018  | 216.3 | 2.01  | 7.80 | 14.3  | 1.91  | 88.9  | 62.8   | 0.0268   | 50.2  | 3.7  | 31.9 |
|           | DLZAC2680M1 | 2018  | 206.0 | 2.07  | 7.90 | 14.8  | 1.46  | 82.6  | 9.0    | 0.0260   | 50.4  | 3.6  | 23.2 |
|           | DLZAC2680M1 | 2020  | 215.3 | 2.18  | 7.80 | 11.3  | 1.63  | 68.1  | 58.1   | 0.0201   | 45.9  | 3.1  | 27.6 |
|           | DLZAC2680M1 | 2021  | 212.9 | 1.86  | 7.80 | 16.6  | 1.75  | 87.5  | 71.3   | 0.0273   | 56.8  | 4.2  | 28.0 |
|           | DLZAC2681   | 2012  | 224.0 | 2.95  | 8.20 | 45.2  | 1.18  | 150.4 | 183.6  | <0.01    | 29.1  | 19.2 | 23.6 |
|           | DLZAC2681   | 2013  | 216.2 | 2.77  | 7.75 | 42.6  | 1.07  | 170.0 | 166.0  | <0.01    | 32.4  | 21.1 | 27.0 |
|           | DLZAC2681   | 2014  | 235.0 | 2.40  | 7.78 | 42.9  | 1.27  | 157.8 | 193.8  | 0.0154   | 31.7  | 21.5 | 25.1 |
|           | DLZAC2681   | 2015  | 227.9 | 2.79  | 8.40 | 40.6  | 1.20  | 171.8 | 182.6  | 0.0154   | 32.6  | 21.1 | 23.6 |
| 71        | DLZAC2681   | 2016  | 231.1 | 2.63  | 7.80 | 83.0  | 1.21  | 155.4 | 223.6  | 0.0137   | 35.3  | 21.1 | 26.5 |
|           | DLZAC2681   | 2017  | 226.7 | 2.88  | 7.50 | 47.7  | 1.09  | 169.1 | 192.6  | 0.0214   | 35.9  | 25.9 | 26.5 |
|           | DLZAC2681   | 2018  | 234.8 | 2.73  | 8.00 | 47.7  | 1.03  | 201.6 | 144.7  | 0.02273  | 38.9  | 25.1 | 25.6 |
|           | DLZAC2681   | 2018  | 250.7 | 2.79  | 8.00 | 46.8  | 1.23  | 192.6 | 208.9  | 0.0208   | 37.2  | 24.1 | 25.5 |
|           | DLZAC2681   | 2019  | 239.4 | 2.89  | 7.60 | 45.8  | 1.16  | 149.0 | 172.3  | 0.0223   | 24.2  | 22.7 | 25.9 |
|           | DLZAC2681   | 2020  | 230.0 | 3.05  | 8.10 | 48.9  | 1.08  | 184.5 | 156.5  | 0.0105   | 30.5  | 19.7 | 24.4 |
|           | DLZAC2682   | 2012  | 170.2 | 1.80  | 7.96 | 47.6  | 0.31  | 71.6  | 61.0   | 0.0271   | 42.6  | 7.5  | 22.6 |
|           | DLZAC2682   | 2013  | 162.2 | 1.79  | 7.67 | 42.1  | 1.51  | 95.1  | 83.5   | <0.01    | 41.0  | 6.5  | 26.2 |
|           | DLZAC2682   | 2014  | 168.5 | 1.54  | 8.11 | 43.6  | 1.61  | 95.8  | 72.7   | 0.0177   | 42.7  | 7.0  | 20.5 |
|           | DLZAC2682   | 2015  | 174.1 | 1.90  | 7.80 | 45.7  | 1.58  | 84.8  | 68.5   | 0.0288   | 42.6  | 4.4  | 23.1 |
| 72        | DLZAC2682   | 2016  | 177.1 | 1.81  | 8.00 | 48.4  | 1.58  | 100.5 | 65.2   | 0.0267   | 55.7  | 9.1  | 25.0 |
|           | DLZAC2682   | 2017  | 167.4 | 2.32  | 7.60 | 59.9  | 1.58  | 99.3  | 83.8   | 0.0175   | 50.4  | 8.1  | 25.6 |
|           | DLZAC2682   | 2018  | 167.1 | 4.23  | 7.50 | 98.5  | 1.22  | 90.5  | 73.0   | 0.0171   | 69.3  | 13.0 | 26.5 |
|           | DLZAC2682   | 2018  | 150.5 | 1.75  | 8.20 | 70.9  | 1.40  | 109.8 | 68.8   | 0.0220   | 49.4  | 10.1 | 18.5 |
|           | DLZAC2682   | 2020  | 170.9 | 3.87  | 7.80 | 77.9  | 1.57  | 87.6  | 89.8   | 0.0207   | 59.4  | 9.4  | 25.3 |
|           | DLZAC2682   | 2021  | 106.3 | 0.85  | 7.88 |       | 0.84  |       |        |          |       |      | 27.0 |
|           | DLZAC5392   | 2016  | 271.3 | 0.46  | 8.20 | <10   | 5.21  | 96.4  | 16.7   | <0.01    | 17.4  | <1   | 30.7 |
|           | DLZAC5392   | 2017  | 223.6 | 0.76  | 8.10 | 13.6  | 5.25  | 94.6  | 15.3   | 0.0111   | 19.3  | 0.2  | 31.4 |
|           | DLZAC5392   | 2018  | 228.6 | 0.51  | 8.40 | 15.3  | 5.65  | 103.4 | 22.7   | <0.00139 | 18.3  | 0.2  | 30.0 |
|           | DLZAC5392   | 2018  | 217.3 | 0.49  | 8.20 | 12.8  | 6.06  | 86.4  | 17.9   | 0.0105   | 15.9  | 0.2  | 30.9 |
| DLZAC5392 | 2019        | 222.6 | 0.51  | 7.90  | 13.5 | 4.23  | 110.4 | 15.8  | 0.0092 | 19.4     | 0.4   | 31.3 |      |
| IV        | DLZAC5392   | 2020  | 219.0 | 0.52  | 8.10 | 11.3  | 5.99  | 97.0  | 18.6   | <0.01    | 16.5  | <1   | 30.8 |

| N  | Well code | Year | Alk   | NO3-N | pH   | Cl   | F    | Na    | SO4  | As       | Ca   | Mg  | T °C |
|----|-----------|------|-------|-------|------|------|------|-------|------|----------|------|-----|------|
|    | DLZAC5392 | 2021 | 215.0 | 0.49  | 7.50 | 14.1 | 6.59 | 115.3 | 19.0 | 0.0167   | 14.0 | <1  | 34.0 |
| 73 | DLZAC5393 | 2016 | 133.8 | 0.22  | 8.30 | <10  | 4.75 | 37.5  | 20.4 | 0.0118   | 29.4 | 2.8 | 30.5 |
| IV | DLZAC5393 | 2017 | 138.3 | 0.21  | 7.60 | 11.7 | 5.31 | 37.3  | 17.7 | 0.0134   | 27.1 | 3.0 | 32.0 |
|    | DLZAC5393 | 2018 | 141.5 | 0.31  | 7.60 | 11.2 | 5.11 | 41.5  | 21.2 | 0.0117   | 29.1 | 2.9 | 30.7 |
|    | DLZAC5393 | 2018 | 126.4 | 0.32  | 7.70 | 9.9  | 4.45 | 37.8  | 18.3 | 0.0183   | 24.6 | 3.4 | 29.4 |
|    | DLZAC5393 | 2020 | 128.1 | 0.32  | 7.70 | <10  | 4.88 | 38.9  | 23.1 | <0.01    | 27.6 | 2.7 | 30.8 |
|    | DLZAC5393 | 2021 | 131.2 | 0.45  | 7.30 | 10.6 | 5.76 | 44.0  | 50.9 | 0.0153   | 30.1 | 3.9 | 32.0 |
| 74 | DLZAC5394 | 2016 | 130.6 | 0.36  | 8.20 | <10  | 5.02 | 25.8  | <15  | <0.01    | 34.2 | <1  | 27.5 |
| IV | DLZAC5394 | 2017 | 125.8 | 0.33  | 7.10 | <10  | 4.89 | 25.7  | 6.6  | <0.00139 | 32.2 | 0.9 | 29.0 |
|    | DLZAC5394 | 2018 | 133.3 | 0.46  | 7.10 | <10  | 5.27 | 28.9  | 13.0 | <0.00139 | 34.9 | 0.9 | 27.0 |
|    | DLZAC5394 | 2018 | 123.2 | 0.47  | 7.40 | <10  | 4.65 | 28.3  | 13.4 | 0.015    | 30.5 | 1.0 | 23.6 |
|    | DLZAC5394 | 2020 | 120.5 | 0.49  | 7.20 | <10  | 5.02 | 25.9  | 15.1 | <0.01    | 28.4 | <1  | 27.4 |
|    | DLZAC5394 | 2021 | 119.3 | 0.49  | 7.40 | <10  | 6.30 | 27.4  | <15  | <0.01    | 36.5 | <1  | 29.0 |
| 75 | DLZAC5395 | 2016 | 170.0 | 2.67  | 8.20 | <10  | 2.88 | 59.8  | 23.8 | 0.0475   | 26.4 | 2.2 | 29.6 |
| IV | DLZAC5395 | 2017 | 167.4 | 1.70  | 7.20 | 12.2 | 2.70 | 55.9  | 21.5 | 0.0545   | 24.1 | 2.5 | 31.9 |
|    | DLZAC5395 | 2018 | 168.3 | 1.98  | 7.81 | 14.2 | 2.78 | 66.5  | 21.2 | 0.0624   | 27.5 | 2.7 | 28.3 |
|    | DLZAC5395 | 2018 | 174.4 | 1.94  | 7.50 | 10.8 | 3.27 | 51.0  | 16.4 | 0.0453   | 22.9 | 2.1 | 27.9 |
|    | DLZAC5395 | 2019 | 166.9 | 2.21  | 7.70 | 9.8  | 2.72 | 82.5  | 21.0 | 0.0680   | 27.2 | 2.3 | 29.2 |
|    | DLZAC5395 | 2020 | 165.4 | 2.10  | 7.60 | <10  | 2.66 | 62.5  | 21.1 | 0.0602   | 29.1 | 2.7 | 28.9 |
|    | DLZAC5395 | 2021 | 163.4 | 2.11  | 7.70 | 11.6 | 2.87 | 67.4  | 24.1 | 0.0659   | 29.9 | 3.3 | 28.0 |
| 76 | DLZAC5396 | 2016 | 233.0 | 0.78  | 8.30 | 12.1 | 6.39 | 88.7  | 15.2 | 0.0293   | 20.8 | <1  | 26.8 |
| IV | DLZAC5396 | 2017 | 223.6 | 0.37  | 7.80 | 13.6 | 7.13 | 93.8  | 13.7 | 0.0279   | 14.8 | 0.8 | 28.5 |
|    | DLZAC5396 | 2018 | 237.8 | 0.81  | 8.20 | 11.2 | 7.45 | 104.1 | 14.5 | 0.0257   | 14.4 | 0.6 | 28.8 |
|    | DLZAC5396 | 2018 | 221.4 | 0.80  | 8.10 | 14.7 | 7.22 | 73.8  | 13.5 | 0.0347   | 11.3 | 0.7 | 26.0 |
|    | DLZAC5396 | 2019 | 232.2 | 0.99  | 8.20 | 9.8  | 3.44 | 107.7 | 9.1  | 0.0351   | 17.4 | 0.8 | 26.9 |
|    | DLZAC5396 | 2020 | 220.1 | 0.48  | 8.00 | <10  | 6.92 | 95.9  | 15.0 | <0.01    | 14.1 | <1  | 27.8 |
|    | DLZAC5396 | 2021 | 226.8 | 1.03  | 7.90 | 10.6 | 7.23 | 105.6 | <15  | 0.0351   | 19.1 | <1  | 26.0 |
