# Supplementary material
Source: MDPI journal article supplement (https://www.mdpi.com/2075-163X/13/9/1145)
Supplement: s1 [file s1 › TableS3_SI.pdf]

**Table S3.** Saturation indices SI for Section III, values in mg L<sup>-1</sup> except for alkalinity (Alk) in mg CaCO<sub>3</sub> L<sup>-1</sup>. Source [22]  
Formula: SI = log(IAP/K<sub>sp</sub>); IAP = ion activity product, K<sub>sp</sub> = solubility product; oversaturated (SI > 1); saturated (SI = 0); undersaturated (SI < 0).

| No. | Well code | Year | Alk   | NO <sub>3</sub> -N | pH   | Cl     | F    | Na    | SO <sub>4</sub> | As       | Ca    | Mg   | T°C  | SI calcite |
|-----|-----------|------|-------|--------------------|------|--------|------|-------|-----------------|----------|-------|------|------|------------|
| 35  | ZAC2641   | 2013 | 212.1 | 5.90               | 7.12 | 21.9   | 0.55 | 65.7  | 465.7           | <0.01    | 186.2 | 38.6 | 26.1 | 0.143      |
| III | ZAC2641   | 2014 | 231.3 | 2.09               | 7.17 | 17.2   | 0.56 | 78.7  | 787.1           | 0.0165   | 259.6 | 52.2 | 22.2 | 0.245      |
|     | ZAC2641   | 2015 | 193.9 | 1.86               | 7.40 | 14.8   | 0.43 | 80.7  | 587.2           | <0.01    | 322.3 | 52.4 | 19.3 | 0.485      |
|     | ZAC2641   | 2016 | 231.1 | 2.38               | 8.70 | 18.2   | 0.51 | 56.5  | 578.9           | 0.016    | 197.3 | 29.7 | 23.0 | 1.620      |
|     | ZAC2641   | 2017 | 226.7 | 1.78               | 7.90 | 20.6   | 0.51 | 87.3  | 610.8           | 0.0150   | 258.0 | 61.7 | 22.5 | 0.983      |
|     | ZAC2641   | 2018 | 235.8 | 3.02               | 7.10 | 28.6   | 0.54 | 127.9 | 948.3           | 0.0206   | 407.5 | 85.2 | 24.9 | 0.371      |
|     | ZAC2641   | 2018 | 215.8 | 1.98               | 8.90 | 24.6   | 0.55 | 102.8 | 941.7           | 0.0308   | 381.2 | 64.1 | 7.0  | 1.742      |
|     | ZAC2641   | 2020 | 179.6 | 6.06               | 7.40 | 12.2   | 0.48 | 67.3  | 433.9           | 0.0182   | 180.2 | 30.5 | 21.9 | 0.369      |
|     | ZAC2641   | 2021 | 238.7 | 5.59               | 6.90 | 34.2   | 0.51 | 112.8 | 910.4           | 0.0206   | 337.4 | 82.5 | 26.0 | 0.121      |
| 36  | ZAC2642   | 2013 | 212.8 | 3.41               | 7.57 | 17.9   | 0.34 | 13.5  | 90.3            | 0.0176   | 135.9 | 4.8  | 16.1 | 0.462      |
| III | ZAC2642   | 2013 | 166.7 | <0.02              | 7.74 | 20.4   | 0.23 | 13.1  | 147.1           | <0.01    | 104.2 | 4.0  | 20.3 | 0.459      |
|     | ZAC2642   | 2015 | 195.0 | 3.70               | 7.60 | 18.4   | 0.22 | 14.1  | 96.6            | 0.0172   | 148.0 | 4.6  | 12.7 | 0.438      |
|     | ZAC2642   | 2016 | 155.4 | 1.82               | 7.80 | 17.8   | 0.22 | 12.0  | 123.1           | <0.01    | 100.7 | 3.8  | 18.9 | 0.472      |
|     | ZAC2642   | 2017 | 219.4 | 2.22               | 7.70 | 22.9   | 0.23 | 13.5  | 133.0           | 0.0136   | 131.7 | 4.6  | 22.3 | 0.656      |
|     | ZAC2642   | 2018 | 198.9 | 2.99               | 7.60 | 19.9   | 0.27 | 15.4  | 125.0           | 0.0245   | 152.6 | 5.0  | 23.6 | 0.600      |
|     | ZAC2642   | 2018 | 204.9 | 2.61               | 7.70 | 22.2   | 0.26 | 16.8  | 135.0           | 0.0254   | 158.4 | 4.4  | 12.3 | 0.562      |
|     | ZAC2642   | 2020 | 163.2 | 1.55               | 7.50 | 18.1   | 0.26 | 13.5  | 133.8           | <0.01    | 95.3  | 4.0  | 25.5 | 0.260      |
|     | ZAC2642   | 2021 | 163.2 | 1.55               | 7.50 | 18.1   | 0.26 | 13.5  | 133.8           | <0.01    | 95.3  | 4.0  | 25.5 | 0.260      |
| 37  | ZAC2643   | 2013 | 218.3 | 2.69               | 7.44 | 20.8   | 0.35 | 11.0  | 187.3           | 0.0269   | 146.1 | 8.0  | 21.5 | 0.410      |
| III | ZAC2643   | 2013 | 214.1 | 2.82               | 7.14 | 20.9   | 0.33 | 11.9  | 189.8           | 0.0519   | 158.7 | 7.7  | 25.4 | 0.000      |
|     | ZAC2643   | 2014 | 230.3 | 2.11               | 6.82 | 15.7   | 0.38 | 10.2  | 92.6            | 0.0236   | 114.9 | 6.2  | 18.0 | -0.288     |
|     | ZAC2643   | 2015 | 222.6 | 2.81               | 7.40 | 19.3   | 0.31 | 11.8  | 137.0           | 0.0355   | 132.3 | 7.7  | 22.9 | 0.000      |
|     | ZAC2643   | 2016 | 213.8 | 2.16               | 7.20 | 20.7   | 0.23 | 44.5  | 187.4           | 0.0502   | 191.3 | 12.6 | 27.7 | 0.345      |
|     | ZAC2643   | 2017 | 234.0 | 2.23               | 7.70 | 22.9   | 0.29 | 11.2  | 149.7           | 0.0377   | 151.1 | 7.9  | 25.9 | 0.779      |
|     | ZAC2643   | 2018 | 213.6 | 2.86               | 7.40 | 25.6   | 0.31 | 14.1  | 197.3           | 0.0529   | 182.9 | 7.6  | 19.3 | 0.493      |
|     | ZAC2643   | 2020 | 222.3 | 2.79               | 7.80 | 19.1   | 0.33 | <10   | 150.1           | 0.0347   | 162.0 | 7.0  | 24.4 | 0.864      |
|     | ZAC2643   | 2021 | 221.5 | 2.70               | 6.60 | 23.2   | 0.31 | 11.7  | 180.5           | 0.0413   | 178.3 | 7.5  | 25.0 | -0.291     |
| 38  | ZAC2644   | 2013 | 324.7 | 1.60               | 7.30 | 258.1  | 0.99 | 242.0 | 119.7           | <0.01    | 116.3 | 13.5 | 19.2 | 0.273      |
| III | ZAC2644   | 2013 | 344.4 | 1.34               | 6.92 | 1053.9 | 0.99 | 710.7 | 459.6           | 0.0753   | 244.6 | 35.7 | 22.4 | 0.112      |
|     | ZAC2644   | 2014 | 310.1 | 1.48               | 7.18 | 248.9  | 0.98 | 222.2 | 201.1           | 0.0216   | 112.4 | 11.9 | 13.1 | 0.017      |
|     | ZAC2644   | 2016 | 379.1 | 2.73               | 7.40 | 843.4  | 1.04 | 848.2 | 445.9           | 0.1211   | 299.7 | 38.7 | 32.3 | 0.837      |
|     | ZAC2644   | 2017 | 377.5 | 3.04               | 7.30 | 1071.6 | 1.14 | 704.0 | 417.0           | 0.0613   | 239.3 | 31.1 | 29.9 | 0.620      |
|     | ZAC2644   | 2018 | 360.8 | 4.77               | 7.20 | 1167.8 | 1.16 | 881.6 | 492.0           | 0.1193   | 316.0 | 31.6 | 15.2 | 0.400      |
|     | ZAC2644   | 2020 | 362.4 | 4.08               | 7.20 | 856.1  | 1.14 | 721.2 | 451.6           | 0.0732   | 251.2 | 28.4 | 23.6 | 0.448      |
|     | ZAC2644   | 2021 | 355.8 | 4.42               | 6.90 | 996.7  | 1.11 | 837.6 | 534.5           | 0.1079   | 290.1 | 39.3 | 33.0 | 0.296      |
|     | ZAC2644   | 2021 | 355.8 | 4.42               | 6.90 | 996.7  | 1.11 | 837.6 | 534.5           | 0.1079   | 290.1 | 39.3 | 33.0 | 0.296      |
| 39  | ZAC2645   | 2013 | 252.5 | 7.31               | 7.30 | 79.2   | 0.71 | 117.5 | 491.0           | <0.01    | 211.9 | 34.7 | 23.9 | 0.414      |
| III | ZAC2645   | 2014 | 244.4 | 6.94               | 7.61 | 51.6   | 0.66 | 94.3  | 502.7           | <0.01    | 186.3 | 29.9 | 17.8 | -0.100     |
|     | ZAC2645   | 2015 | 238.5 | 6.83               | 7.50 | 54.2   | 0.67 | 109.1 | 387.4           | <0.01    | 199.5 | 29.7 | 19.0 | -0.149     |
|     | ZAC2645   | 2016 | 246.2 | 6.35               | 7.80 | 54.4   | 0.59 | 170.0 | 477.5           | <0.01    | 252.7 | 45.5 | 23.3 | 0.944      |
|     | ZAC2645   | 2017 | 135.2 | 7.20               | 8.30 | 80.0   | 0.66 | 133.5 | 567.9           | <0.00139 | 192.9 | 42.3 | 23.3 | -0.023     |
|     | ZAC2645   | 2018 | 235.8 | 8.43               | 7.50 | 69.9   | 0.70 | 135.7 | 597.9           | <0.00139 | 274.5 | 41.5 | 25.3 | 0.426      |
|     | ZAC2645   | 2018 | 248.5 | 9.64               | 7.80 | 64.1   | 0.65 | 131.5 | 560.8           | <0.00139 | 270.4 | 36.5 | 17.0 | 0.880      |
|     | ZAC2645   | 2020 | 227.8 | 10.58              | 7.50 | 75.8   | 0.61 | 151.0 | 633.5           | <0.01    | 299.9 | 39.5 | 22.2 | 0.650      |
|     | ZAC2645   | 2020 | 227.8 | 10.58              | 7.50 | 75.8   | 0.61 | 151.0 | 633.5           | <0.01    | 299.9 | 39.5 | 22.2 | 0.650      |
